# Supplementary material
Source: PubMed Central journal article supplement (PMC3158198)
Supplement: 1102444108_sapp.pdf [file 1102444108_sapp.pdf]

# Materials and Methods

## Strains and culture conditions

*C. thermocellum* wild-type (WT) strains ATCC 27405 DSM 1313 were obtained from their respective culture collections. *C. thermocellum* ethanol adapted (EA) mutant derived from strain ATCC 27405 has been described previously (1). *C. thermocellum* strain DSM 1313 was cultured in modified M122 medium (2, 3) at 55°C and all *C. thermocellum* growth studies contained cellobiose as the sole carbon source. *Saccharomyces cerevisiae* InvSc1 was grown at 30°C in YPD medium prior to transformation and SD-ura medium upon transformation with URA3+ plasmids, and *E. coli* Top10 was cultured in LB medium at 37°C. To select for the presence of plasmids, thiamphenicol (10 mg/ml) and chloramphenicol (12 mg/ml) were used for *C. thermocellum* and *Escherichia coli*, respectively.

## Resequencing

Resequencing was conducted essentially as described previously (4). Briefly, genomic DNA from *C. thermocellum* wild-type ATCC27405 or EA mutant was isolated using a Wizard Genomic DNA purification kit (Promega, Madison, WI). Genomic DNA of wild-type ATCC 27405 and EA mutant was sent to NimbleGen facility for CGS service following the company's procedure. Pyrosequencing using the Roche 454 GS FLX System (454 Life Sciences, Bradford, CT) was carried out using both shotgun and paired-end DNA library preparation methods and have been deposited in the National Center for Biotechnology Information (NCBI) short-read archive database (SRX030163.2 and SRX030164.1, respectively). The GSMapper application in the 454 GS FLX software package 1.1.03 (454 Life Sciences) was used to map the reads generated from GS FLX onto the *C. thermocellum* ATCC 27405 reference genome (GenBank accession: CP000568).

## Analysis of distribution of mutations inferred from pyrosequencing data

Distribution of the mutations across the genome was analyzed by calculating quantities of each type of mutation (total mutations, non-synonymous, synonymous, indels, and number of mutations in the intergenic regions)

within each 1000 and each 5000 nucleotides across the genome. For each position in the genome ( $L_i$ ) we also calculated the Local Mutation Frequency (LMP) as  $LMP = 1 / ((M_{up} - L_i) + (L_i - M_{down})) / 2 * 100$ , where  $L_{up}$  is the start position of the closest upstream mutation and  $L_{down}$  is the start position of the closest downstream mutation. Mutation hot spots were identified by manual curation of the distributions and by analysis of potential functional relationships between genes comprising each hot spot. In bacteria the neighboring gene or genes may comprise an operon and are likely involved in the same biological process or metabolic pathway. To find out if mutations target such functionally related genes we calculated the number of mutations in each pair of genes and in genes that belong to an operon with subsequent manual analysis of the effected protein products and their annotation with MetaCyc pathways (5) using *C. thermocellum* pathway genome database available in the BioEnergy Science Center (BESC) Knowledgebase ([http://cricket.ornl.gov/cgi-bin/beocyc\\_home.cgi](http://cricket.ornl.gov/cgi-bin/beocyc_home.cgi)). At least one non-synonymous mutation in two adjacent genes or in a gene of the operon was required to consider mutations as functionally related. The intergenic region was considered as functionally related to a hot spot if the distance from a mutation in the region to a mutated gene/operon was less than 400 nucleotides.

### Plasmid and strain construction

Yeast gap repair cloning (6) was used to insert the WT and EA *adhE* alleles into plasmid pAMG205 (2), deleting *pyrF* and creating an artificial operon with the antibiotic resistance gene, *cat*, for expression in *C. thermocellum*. Briefly, the *adhE* alleles were PCR amplified from *C. thermocellum* WT and EA using primers **GGCCTAATGACTGGCTTTTATAATAAAGGAGGTCGACGTCATGACGAAAATAGCGAATAAATAC** and **G** and **CAGTCTTCCGACTGAGCCTTTTGTTTTCTCGAGGCCCGGGTCATTTCTTCGCACCTCCGTAAT** (priming regions in **bold**). These PCR products were each transformed along with *ZraI*+*SmaI* digested pAMG205 into *S. cerevisiae* InvSc1 (Invitrogen, Carlsbad, CA) via a modified Lazy Bones protocol (7). Plasmid was isolated using a Zymoprep Yeast Plasmid Miniprep II kit (Zymo, Orange, CA, USA) and electroporated into *E. coli* Top10 for verification, resulting in pAMG242 (mutant *adhE*) and pAMG249 (WT *adhE*). Empty vector control plasmid pAMG226 (pAMG205  $\square$  *pyrF*) was constructed via restriction digestion of

pAMG205 with *ZraI* and *SmaI*, followed by self-ligation of the 6.9 kb fragment and transformation into *E. coli* Top10. Plasmids were then transformed into *C. thermocellum* DSM 1313 via electroporation as described (2) with modifications. To make *C. thermocellum* electrocompetent, 500 ml cultures were grown to an OD<sub>600</sub> of 0.6 - 1.0 and placed on ice to cool. Cells were then centrifuged at 6000 × g for 15 minutes at room temperature in a Beckman Coulter Avanti J-25 centrifuge with a JA-10 rotor, the supernatant was removed, and the cell pellet was washed twice with electroporation buffer (250 mM sucrose, 10% glycerol, 100 μM MOPS pH 7.0, 0.5 mM MgCl<sub>2</sub>, 0.5 mM MgSO<sub>4</sub>) in a similar fashion. Cells were then brought into a Coy anaerobic chamber (Coy Laboratory Products, Grass Lake, MI) and resuspended in 500 ml electroporation buffer. Plasmid DNA (ca. 500 ng) was mixed with 20 ml washed cells in a pre-chilled 1 mm electroporation cuvette, and the cell/DNA mixture was subjected to a 1.2 kV, 1.5 msec square wave pulse using a BioRad GenePulser XCell. Electroporated cells were resuspended in 1 ml growth medium and mixed with ca. 25 ml growth medium supplemented with 0.8% agar and thiamphenicol. Plates were allowed to solidify and were placed in 2.5 L AnaeroPack Rectangular Jars (bioMerieux, Durham, NC, USA) and incubated at 51°C for up to one week. Colonies were picked into liquid growth medium containing thiamphenicol stored at -80°C for preservation.

### ***C. thermocellum* growth experiments**

*C. thermocellum* strains carrying pAMG226 (empty vector), pAMG249 (WT *adhE*), and pAMG242 (mutant *adhE*) were grown to an OD<sub>600</sub> of 1.0, and used as inocula (2% v/v) into 25 ml sealed Balch tubes containing 10 ml medium supplemented with 0, 1, 2, 3, and 5% (v/v) added ethanol. Cultures were incubated at 55°C, and growth was monitored via absorbance using a ThermoSpectric Genesys 10 vis spectrophotometer at 600 nm.

### **ADH enzyme assays**

The ADH enzyme assays are based on previously described methods (8, 9). Briefly, half liter cultures of each strain were grown to OD<sub>600</sub> = 0.6 and centrifuged at 4°C at 6000 x g in a Beckman Coulter Avanti J-25 centrifuge with a JA-10 rotor. The culture was brought into the anaerobic chamber, and the supernatant was

removed. All further steps were carried out in the anaerobic chamber. The cell pellet was resuspended in 4 mL 100 mM Tris-HCl (pH 7.6) 0.1 mM dithiothreitol buffer, transferred to a 10 mL glass beaker, and sonicated for 8 minutes with 10 second pulses and 10 second pauses at 50% of the max intensity using a Misonix Sonicator 4000 with a microtip. Crude cell extract was centrifuged at 14000 x g for 25 min and stored on ice until assayed. The anaerobic reaction mixture contained 100 mM Tris-HCl (pH 7.6) 0.1 mM dithiothreitol buffer, 0.5 mM NAD(P)H, 55 mM acetaldehyde, and 2 – 50  $\mu$ l cell extract in 1.2 ml total volume. Decrease in absorbance was monitored at 340 nm to follow NAD(P)H oxidation (extinction coefficient 6.22 mM<sup>-1</sup> cm<sup>-1</sup>) using an Agilent 8453 UV-Vis spectrophotometer with Peltier controlled heating set at 55°C. Protein concentration was determined using the Bradford method.

### **Homology modelling of *C. thermocellum***

AdhE. Using the protein sequence of the alcohol dehydrogenase (AdhE) domain of *C. thermocellum* ALDH/ADH, homology models of wild-type and double-mutant AdhE were constructed. The HHPRED webserver (10, 11), part of the Bioinformatics Toolkit webserver (12), was used to perform multiple sequence alignments of the *C. thermocellum* AdhE sequence to potential structural templates available in the Protein Data Bank (13). The 2.7 Å resolution X-ray structure of 1,3-propanediol dehydrogenase from *Klebsiella pneumoniae* (PDB ID 3BFJ) (14) and the 1.3 Å X-ray structure of Fe-containing alcohol dehydrogenase from *Thermotoga maritima* Tm0920 (PDB ID 1O2D)(15) were selected as templates based on their homology to AdhE, and inclusion of NAD(P), Fe, or both in the structures. The program MODELLER (16-19) was used to construct homology structures including the NAD cofactor and Fe ligand, and resulting models were assessed using the Discrete Optimized Protein Energy (DOPE) method (20). The fully automated I-TASSER webserver (21) was also used to construct a homology model, and it was found that MODELLER produced structures with a more favorable (i.e. lower) DOPE score if the I-TASSER model was included as an additional template structure. The reason this step improved the model is because the AdhE sequence has two regions that are not covered by either of the two PDB templates, and I-TASSER includes secondary structure prediction for sequences with no structural template. These regions are positioned on the same face of the protein as the N-terminus, which

would be joined to the C-terminus of the ALDH domain in the full-length ALDH/ADH. Thus, it is likely that these two regions interact with ALDH, providing a possible explanation for why they are not present in other single-domain alcohol dehydrogenases. To provide an additional level of validation of the homology structures, the MolProbity server (22, 23) was used to perform a Ramachandran analysis on the final models. For wild-type AdhE, 92% of all residues were found to be in favored regions, and 98.3% were in allowed regions. Seven residues were found to be outliers, an acceptable result considering the somewhat low sequence identity between the AdhE sequence and structural templates.

### **Molecular dynamics simulations**

Molecular dynamics simulations were performed on the homology models on wild-type and double mutant (P704L, H734R) AdhE using the program GROMACS (24) with the CHARMM 27 force field (25) and TIP3P water model (26). Previously Lennard-Jones parameters for Fe(II) were used (27). Energy minimization was performed on the homology structures using the steepest descent method for 1000 steps, and then each protein was solvated in a rectangular water box of with a minimum of 10 Å from the surface of the protein to the edge of the solvent box. Sodium cations were added to neutralize the charge of the system. Periodic boundary conditions were imposed, and the Particle Mesh Ewald (PME) method (28, 29) was used to describe long-range electrostatic interactions. MD simulations were carried out with an integration time step of 2 fs. To reach the target temperature (298 K) and pressure (1 bar), the Berendsen method was used with a relaxation time of 0.1 ps (30). After a 1 ns equilibration, production simulations were performed in the NPT ensemble using the Nose-Hoover thermostat (31, 32) and the Parrinello-Rahman barostat (33, 34) with relaxation times of 1.0 ps. The production run was carried out for 10 ns, and coordinates were saved every 1 ps for analysis.

### **References**

1. Williams TI, Combs JC, Lynn BC, & Strobel HJ (2007) Proteomic profile changes in membranes of ethanol-tolerant *Clostridium thermocellum*. *Appl. Microbiol. Biotechnol.* 74:422-432.

2. Olson DG, *et al.* (2010) Deletion of the Cel48S cellulase from *Clostridium thermocellum*. *Proc. Natl. Acad. Sci. U. S. A.* 107:17727-17732.
3. Tyurin MV, Sullivan CR, & Lynd LR (2005) Role of spontaneous current oscillations during high-efficiency electrotransformation of thermophilic anaerobes. *Appl. Environ. Microbiol.* 71:8069-8076.
4. Burdette D & Zeikus JG (1994) Purification of acetaldehyde dehydrogenase and alcohol dehydrogenases from *Thermoanaerobacter ethanolicus* 39E and characterization of the secondary-alcohol dehydrogenase (2 degrees Adh) as a bifunctional alcohol dehydrogenase--acetyl-CoA reductive thioesterase. *Biochem. J.* 302:163-170.
5. Caspi R, *et al.* (2010) The MetaCyc database of metabolic pathways and enzymes and the BioCyc collection of pathway/genome databases. *Nucleic Acids Res.* 38:D473-D479.
6. Burke D, Dawson D, & Stearns T (2000) *Methods in yeast genetics: a Cold Spring Harbor Laboratory course manual* (Cold Spring Harbor Press, Plainview, N.Y.).
7. Elble R (1992) A simple and efficient procedure for transformation of yeasts. *Biotechniques* 13:18-20.
8. Durre P, Kuhn A, Gottwald M, & Gottschalk G (1987) Enzymatic investigations on butanol dehydrogenase and butyraldehyde dehydrogenase in extracts of *Clostridium acetobutylicum*. *Appl. Microbiol. Biotechnol.* 26:268-272.
9. Shaw AJ, Jenney FE, Adams MWW, & Lynd LR (2008) End-product pathways in the xylose fermenting bacterium, *Thermoanaerobacterium saccharolyticum*. *Enz. Microbial Technol.* 42:453-458.
10. Söding J (2005) Protein homology detection by HMM-HMM comparison. *Bioinformatics* 21:2144-2144.
11. Söding J, Biegert A, & Lupas AN (2005) The HHpred interactive server for protein homology detection and structure prediction. *Nucleic Acids Res.* 33:W244-W248.
12. Biegert A, Mayer C, Remmert M, Söding J, & Lupas AN (2006) The MPI Bioinformatics Toolkit for protein sequence analysis. *Nucleic Acids Res.* 34:W335-W339.
13. Berman HM, *et al.* (2000) The Protein Data Bank. *Nucleic Acids Res.* 28:235-242.
14. Marcal D, Rego AT, Carrondo MA, & Enguita FJ (2009) 1,3-Propanediol dehydrogenase from *Klebsiella pneumoniae*: decameric quaternary structure and possible subunit cooperativity. *J. Bacteriol.* 191:1143-1151.
15. Schwarzenbacher R, *et al.* (2004) Crystal structure of an iron-containing 1,3-propanediol dehydrogenase (TM0920) from *Thermotoga maritima* at 1.3 angstrom resolution. *Proteins, Struct. Funct. Bioinf.* 54:174-177.
16. Eswar N, *et al.* (2006) Comparative Protein Structure Modeling Using Modeller. *Curr. Protoc. Bioinformatics*, (John Wiley & Sons, Inc.), Vol Supplement 15, pp 5.6.1-5.6.30.
17. Fiser A, Do RKG, & Sali A (2000) Modeling of loops in protein structures. *Protein Sci.* 9:1753-1773.
18. Marti-Renom MA, *et al.* (2000) Comparative protein structure modeling of genes and genomes. *Annu. Rev. Biophys. Biomol. Struct.* 29:291-325.
19. Sali A & Blundell TL (1993) Comparative protein modeling by satisfaction of spatial restraints. *J. Mol. Biol.* 234:779-815.
20. Shen MY & Sali A (2006) Statistical potential for assessment and prediction of protein structures. *Protein Sci.* 15:2507-2524.
21. Roy A, Kucukural A, & Zhang Y (2010) I-TASSER: a unified platform for automated protein structure and function prediction. *Nat. Protocols* 5:725-738.
22. Chen VB, *et al.* (2010) MolProbity: all-atom structure validation for macromolecular crystallography. *Acta Cryst. D* 66:12-21.
23. Davis IW, *et al.* (2007) MolProbity: all-atom contacts and structure validation for proteins and nucleic acids. *Nucleic Acids Research* 35:W375-W383.
24. Hess B, Kutzner C, van der Spoel D, & Lindahl E (2008) GROMACS 4: Algorithms for highly efficient, load-balanced, and scalable molecular simulation. *J. Chem. Theory Comput.* 4:435-447.
25. Brooks BR, *et al.* (1983) Charmm - a program for macromolecular energy, minimization, and dynamics calculations. *J. Comput. Chem.* 4:187-217.
26. Jorgensen WL, Chandrasekhar J, Madura JD, Impey RW, & Klein ML (1983) Comparison of simple potential functions for simulating liquid water. *J. Chem. Phys.* 79:926-935.

27. Babu CS & Lim C (2006) Empirical force fields for biologically active divalent metal cations in water. *J. Phys. Chem. A* 110:691-699.
28. Darden T, York D, & Pedersen L (1993) Particle mesh Ewald - An N.log(N) method for Ewald sums in large systems. *J. Chem. Phys.* 98:10089-10092.
29. Essmann U, *et al.* (1995) A smooth particle Mesh Ewald method. *J. Chem. Phys.* 103:8577-8593.
30. Berendsen HJC, Postma JPM, Vangunsteren WF, Dinola A, & Haak JR (1984) Molecular-dynamics with coupling to an external bath. *J. Chem. Phys.* 81:3684-3690.
31. Hoover WG (1985) Canonical dynamics - Equilibrium phase-space distributions. *Phys. Rev. A* 31:1695-1697.
32. Nose S & Klein ML (1983) Constant pressure molecular-Dynamics for molecular-systems. *Mol. Phys.* 50:1055-1076.
33. Nose S (1984) A molecular-dynamics method for simulations in the canonical ensemble. *Mol. Phys.* 52:255-268.
34. Parrinello M & Rahman A (1981) Polymorphic transitions in single-crystals - a new molecular-dynamics method. *J. Appl. Phys.* 52:7182-7190.

Table S1. High confidence differences identified in wild-type strain by pyrosequencing

| Replicon | Start Pos | End Pos | Reference sequence | Observed sequence    | Region     | Change | Codon number | Orig_AA | New_AA | Locus_Tag | Gene start | Gene stop | Strand | Product                                          | Pyrosequencing results |             |      |      |     |             |         |
|----------|-----------|---------|--------------------|----------------------|------------|--------|--------------|---------|--------|-----------|------------|-----------|--------|--------------------------------------------------|------------------------|-------------|------|------|-----|-------------|---------|
|          |           |         |                    |                      |            |        |              |         |        |           |            |           |        |                                                  | # reads fwd            | # reads rev | #Var | #Tot | (%) | Found in EA |         |
| CP000568 | 3073025   | 3073025 | C                  | T                    | INTERGENIC | Mul    |              |         |        |           |            |           |        |                                                  |                        | 10          | 12   | 22   | 22  | 100         |         |
| CP000568 | 1463053   | 1463053 | T                  | C                    | NON        | One    | 391 T        | A       |        | Cthe1221  | 1455455    | 1464223 - |        | glycosyltransferase 36                           |                        | 9           | 17   | 26   | 26  | 100         | 1463053 |
| CP000568 | 3833351   | 3833351 | T                  | C                    | NON        | Mul    | 274 W        | R       |        | Cthe3232  | 3832532    | 3837541 + |        | YD repeat protein                                |                        | 21          | 13   | 34   | 34  | 100         | 3833351 |
| CP000568 | 2315283   | 2315283 | C                  | -                    | NON        | Del    | 334 G        | -       |        | Cthe1939  | 2314949    | 2316283 - |        | magnesium transporter                            |                        | 18          | 16   | 34   | 35  | 97          |         |
| CP000568 | 2088722   | 2088722 | G                  | -                    | NON        | One    | 149 A        | V       |        | Cthe1766  | 2088334    | 2089167 - |        | glutamate 5-kinase                               |                        | 15          | 20   | 35   | 40  | 87          |         |
| CP000568 | 3373938   | 3373938 | A                  | G                    | SYN        | One    | 226 G        | G       |        | Cthe2855  | 3373261    | 3374499 + |        | conserved hypothetical protein                   |                        | 12          | 14   | 26   | 51  | 51          | 3373938 |
| CP000568 | 3373944   | 3373944 | T                  | G                    | SYN        | One    | 228 D        | D       |        | Cthe2855  | 3373261    | 3374499 + |        | conserved hypothetical protein                   |                        | 13          | 14   | 27   | 53  | 51          |         |
| CP000568 | 1198646   | 1198646 | G                  | -                    | NON        | One    | 116 S        | L       |        | Cthe1000  | 1198156    | 1198992 - |        | phosphatidate cytidylyltransferase               |                        | 8           | 2    | 10   | 21  | 48          |         |
| CP000568 | 3342625   | 3342627 | TGA                | -                    | NON        | Del    | 560 N        | -       |        | Cthe2825  | 3340946    | 3342793 + |        | conserved hypothetical protein precursor         |                        | 11          | 9    | 20   | 47  | 43          | 3342625 |
| CP000568 | 3342638   | 3342638 | G                  | A                    | NON        | Mul    | 565 E        | K       |        | Cthe2825  | 3340946    | 3342793 + |        | conserved hypothetical protein precursor         |                        | 11          | 10   | 21   | 49  | 43          | 3342638 |
| CP000568 | 2397516   | 2397516 | A                  | C                    | NON        | Mul    | 60 M         | R       |        | Cthe2018  | 2396459    | 2397694 - |        | conserved hypothetical protein                   |                        | 17          | 10   | 27   | 65  | 42          | 2397516 |
| CP000568 | 2397410   | 2397410 | T                  | C                    | SYN        | One    | 95 E         | E       |        | Cthe2018  | 2396459    | 2397694 - |        | conserved hypothetical protein                   |                        | 12          | 11   | 23   | 56  | 41          | 2397410 |
| CP000568 | 2397503   | 2397509 | ATTCATG            | GTCCATA              | NON        | One    | 64 N         | -       |        | Cthe2018  | 2396459    | 2397694 - |        | conserved hypothetical protein                   |                        | 16          | 10   | 26   | 64  | 41          | 2397503 |
| CP000568 | 2371533   | 2371535 | GCC                | -                    | NON        | Del    | 113 A        | -       |        | Cthe1900  | 2371523    | 2371870 - |        | hypothetical protein                             |                        | 1           | 3    | 4    | 10  | 40          | 2371533 |
| CP000568 | 1198190   | 1198190 | G                  | A                    | NON        | One    | 268 P        | L       |        | Cthe1000  | 1198156    | 1198992 - |        | phosphatidate cytidylyltransferase               |                        | 6           | 8    | 14   | 35  | 40          |         |
| CP000568 | 1776760   | 1776760 | G                  | A                    | NON        | One    | 189 P        | S       |        | Cthe1457  | 1776662    | 1777324 - |        | polar amino acid ABC transporter, inner membrane |                        | 7           | 7    | 14   | 35  | 40          |         |
| CP000568 | 2397524   | 2397526 | TTG                | GTC                  | NON        | One    | 57 Q         | -       |        | Cthe2018  | 2396459    | 2397694 - |        | conserved hypothetical protein                   |                        | 17          | 10   | 27   | 67  | 40          | 2397524 |
| CP000568 | 488360    | 488360  | -                  | GATATGCAGGAATATACTAC | NON        | Ins    | 191 K        | -       |        | Cthe0392  | 487789     | 488833 +  |        | inner-membrane translocator                      |                        | 7           | 9    | 16   | 41  | 39          |         |
| CP000568 | 3342604   | 3342621 | GATAGGTGATAAAACAGG | AAAGGGTGTAGATCAGGGGA | NON        | One    | 553 L        | -       |        | Cthe2825  | 3340946    | 3342793 + |        | conserved hypothetical protein precursor         |                        | 7           | 8    | 15   | 39  | 38          | 3342604 |
| CP000568 | 2397551   | 2397554 | TTGG               | CTGA                 | NON        | Mul    | 48 Q         | -       |        | Cthe2018  | 2396459    | 2397694 - |        | conserved hypothetical protein                   |                        | 16          | 8    | 24   | 64  | 37          | 2397551 |
| CP000568 | 956162    | 956162  | G                  | AGT                  | NON        | One    | 234 S        | -       |        | Cthe0792  | 956159     | 956863 -  |        | Protein of unknown function UPF0001              |                        | 8           | 1    | 9    | 26  | 35          |         |
| CP000568 | 2219915   | 2219915 | -                  | A                    | INTERGENIC | Ins    |              |         |        |           |            |           |        |                                                  |                        | 2           | 8    | 10   | 30  | 33          |         |
| CP000568 | 2397590   | 2397590 | G                  | A                    | SYN        | Mul    | 35 D         | D       |        | Cthe2018  | 2396459    | 2397694 - |        | conserved hypothetical protein                   |                        | 10          | 4    | 14   | 43  | 33          |         |
| CP000568 | 3342592   | 3342592 | G                  | A                    | SYN        | One    | 549 S        | S       |        | Cthe2825  | 3340946    | 3342793 + |        | conserved hypothetical protein precursor         |                        | 7           | 7    | 14   | 42  | 33          | 3342592 |
| CP000568 | 582135    | 582135  | A                  | G                    | SYN        | One    | 66 K         | K       |        | Cthe0467  | 581938     | 582729 +  |        | Flagellar biosynthesis/type III secretory        |                        | 2           | 6    | 8    | 25  | 32          |         |
| CP000568 | 2394647   | 2394647 | C                  | T                    | INTERGENIC | Mul    |              |         |        |           |            |           |        |                                                  |                        | 2           | 7    | 9    | 28  | 32          |         |
| CP000568 | 2796652   | 2796652 | -                  | A                    | NON        | Ins    | 730 L        | F       |        | Cthe2346  | 2795812    | 2798841 - |        | O-antigen polymerase                             |                        | 7           | 3    | 10   | 32  | 31          |         |
| CP000568 | 2397467   | 2397467 | A                  | G                    | SYN        | One    | 76 P         | P       |        | Cthe2018  | 2396459    | 2397694 - |        | conserved hypothetical protein                   |                        | 12          | 8    | 20   | 64  | 31          |         |
| CP000568 | 3373687   | 3373689 | TCC                | GCT                  | NON        | One    | 143 S        | -       |        | Cthe2855  | 3373261    | 3374499 + |        | conserved hypothetical protein                   |                        | 5           | 4    | 9    | 30  | 30          |         |
| CP000568 | 2397277   | 2397277 | A                  | G                    | SYN        | Mul    | 140 L        | L       |        | Cthe2018  | 2396459    | 2397694 - |        | conserved hypothetical protein                   |                        | 3           | 5    | 8    | 28  | 29          | 2397277 |
| CP000568 | 3373707   | 3373707 | T                  | C                    | SYN        | Mul    | 149 N        | N       |        | Cthe2855  | 3373261    | 3374499 + |        | conserved hypothetical protein                   |                        | 5           | 3    | 8    | 28  | 29          | 3373707 |
| CP000568 | 1563377   | 1563377 | -                  | T                    | NON        | Ins    | 379 A        | T       |        | Cthe1286  | 1562982    | 1564511 - |        | peptidase S1 and S6, chymotrypsin/Hap            |                        | 7           | 2    | 9    | 31  | 29          |         |
| CP000568 | 3342959   | 3342959 | A                  | G                    | SYN        | One    | 48 Q         | Q       |        | Cthe2826  | 3342816    | 3344054 + |        | conserved hypothetical protein                   |                        | 7           | 4    | 11   | 41  | 27          | 3342959 |
| CP000568 | 1276285   | 1276285 | -                  | A                    | NON        | Ins    | 88 D         | Y       |        | Cthe1069  | 1276058    | 1276546 - |        | protein of unknown function UPF0054              |                        | 1           | 2    | 3    | 12  | 25          |         |
| CP000568 | 2290234   | 2290234 | G                  | CGT                  | NON        | One    | 13 G         | -       |        | Cthe1919  | 2289574    | 2290272 - |        | MgTC/SapB transporter                            |                        | 1           | 3    | 4    | 16  | 25          |         |
| CP000568 | 3374106   | 3374106 | A                  | G                    | SYN        | One    | 282 R        | R       |        | Cthe2855  | 3373261    | 3374499 + |        | conserved hypothetical protein                   |                        | 2           | 7    | 9    | 36  | 25          | 3374106 |
| CP000568 | 311030    | 311030  | C                  | T                    | SYN        | One    | 99 G         | G       |        | Cthe0253  | 310734     | 311723 +  |        | ATPase associated with various cellular          |                        | 3           | 3    | 6    | 25  | 24          |         |
| CP000568 | 2110164   | 2110164 | G                  | CGA                  | NON        | One    | 42 S         | -       |        | Cthe1788  | 2110040    | 2111296 + |        | glycosyl transferase, family 2                   |                        | 1           | 5    | 6    | 25  | 24          |         |
| CP000568 | 3327479   | 3327482 | TTAA               | AAAT                 | INTERGENIC | One    |              |         |        |           |            |           |        |                                                  |                        | 4           | 2    | 6    | 25  | 24          | 3327479 |
| CP000568 | 488356    | 488356  | T                  | ATA                  | NON        | One    | 190 S        | -       |        | Cthe0392  | 487789     | 488833 +  |        | inner-membrane translocator                      |                        | 5           | 4    | 9    | 39  | 23          |         |
| CP000568 | 3342563   | 3342563 | A                  | G                    | NON        | One    | 540 T        | A       |        | Cthe2825  | 3340946    | 3342793 + |        | conserved hypothetical protein precursor         |                        | 5           | 3    | 8    | 36  | 22          | 3342563 |
| CP000568 | 829398    | 829398  | -                  | TA                   | INTERGENIC | Ins    |              |         |        |           |            |           |        |                                                  |                        | 2           | 2    | 4    | 19  | 21          |         |
| CP000568 | 1597777   | 1597777 | G                  | A                    | NON        | One    | 150 P        | S       |        | Cthe1313  | 1597028    | 1598224 - |        | phosphopantothenoylcysteine                      |                        | 5           | 1    | 6    | 28  | 21          |         |
| CP000568 | 2565681   | 2565682 | AT                 | TA                   | INTERGENIC | One    |              |         |        |           |            |           |        |                                                  |                        | 1           | 5    | 6    | 29  | 21          |         |
| CP000568 | 2197451   | 2197451 | C                  | T                    | INTERGENIC | One    |              |         |        |           |            |           |        |                                                  |                        | 5           | 3    | 8    | 38  | 21          |         |
| CP000568 | 3342559   | 3342559 | T                  | G                    | SYN        | One    | 538 L        | L       |        | Cthe2825  | 3340946    | 3342793 + |        | conserved hypothetical protein precursor         |                        | 5           | 3    | 8    | 38  | 21          | 3342559 |
| CP000568 | 3342553   | 3342553 | G                  | A                    | SYN        | One    | 536 A        | A       |        | Cthe2825  | 3340946    | 3342793 + |        | conserved hypothetical protein precursor         |                        | 4           | 3    | 7    | 36  | 19          | 3342553 |
| CP000568 | 3374120   | 3374124 | GATTC              | AGTTT                | NON        | One    | 287 R        | -       |        | Cthe2855  | 3373261    | 3374499 + |        | conserved hypothetical protein                   |                        | 2           | 5    | 7    | 36  | 19          |         |
| CP000568 | 3112041   | 3112041 | G                  | A                    | SYN        | Mul    | 467 R        | R       |        | Cthe2632  | 3110641    | 3114177 + |        | transcription-repair coupling factor             |                        | 1           | 3    | 4    | 22  | 18          |         |
| CP000568 | 2721434   | 2721435 | TC                 | GTT                  | INTERGENIC | One    |              |         |        |           |            |           |        |                                                  |                        | 1           | 5    | 6    | 33  | 18          |         |
| CP000568 | 975105    | 975106  | TG                 | CT                   | NON        | One    | 145 E        | -       |        | Cthe0806  | 972830     | 975538 -  |        | PAS/PAC sensor hybrid histidine kinase           |                        | 3           | 1    | 4    | 23  | 17          |         |
| CP000568 | 3281497   | 3281498 | GG                 | AA                   | INTERGENIC | One    |              |         |        |           |            |           |        |                                                  |                        | 2           | 2    | 4    | 23  | 17          |         |
| CP000568 | 1221337   | 1221337 | G                  | A                    | NON        | One    | 102 T        | I       |        | Cthe1020  | 1220262    | 1221641 - |        | extracellular solute-binding protein, family 1   |                        | 1           | 4    | 5    | 29  | 17          |         |
| CP000568 | 1155791   | 1155791 | C                  | ACT                  | INTERGENIC | One    |              |         |        |           |            |           |        |                                                  |                        | 2           | 1    | 3    | 19  | 16          |         |
| CP000568 | 835435    | 835435  | T                  | C                    | NON        | One    | 48 V         | A       |        | Cthe0679  | 835293     | 836507 +  |        | Serine-type D-Ala-D-Ala carboxypeptidase         |                        | 2           | 2    | 4    | 25  | 16          |         |
| CP000568 | 2451889   | 2451889 | G                  | A                    | SYN        | One    | 94 S         | S       |        | Cthe2060  | 2451337    | 2452170 - |        | RNA methyltransferase, TrmH family, group 3      |                        | 3           | 3    | 6    | 37  | 16          |         |
| CP000568 | 2019375   | 2019375 | G                  | A                    | NON        | One    | 139 S        | F       |        | Cthe1695  | 2018315    | 2019790 - |        | Radical SAM                                      |                        | 1           | 3    | 4    | 26  | 15          |         |
| CP000568 | 149324    | 149324  | G                  | CGA                  | NON        | One    | 77 S         | -       |        | Cthe0116  | 149095     | 150039 +  |        | protein of unknown function DUF199               |                        | 1           | 2    | 3    | 21  | 14          |         |
| CP000568 | 2199693   | 2199693 | G                  | A                    | NON        | One    | 60 A         | V       |        | Cthe1853  | 2199671    | 2199871 - |        | cold-shock DNA-binding domain protein            |                        | 1           | 2    | 3    | 23  | 13          |         |
| CP000568 | 3373046   | 3373052 | TTAGTGG            | CTAAAGGGT            | NON        | One    | 553 L        | -       |        | Cthe2854  | 3371390    | 3373237 + |        | conserved hypothetical protein precursor         |                        | 2           | 2    | 4    | 30  | 13          | 3373046 |
| CP000568 | 3373064   | 3373067 | AGAA               | GGGG                 | NON        | Mul    | 559 R        | -       |        | Cthe2854  | 3371390    | 3373237 + |        | conserved hypothetical protein precursor         |                        | 2           | 2    | 4    | 31  | 13          |         |
| CP000568 | 1477522   | 1477522 | G                  | T                    | NON        | One    | 179 K        | N       |        | Cthe1233  | 1476986    | 1477525 + |        | hypothetical protein                             |                        | 2           | 1    | 3    | 24  | 12          |         |



Table S2. High confidence differences identified in strain EA by pyrosequencing

| Replicon | Start Pos | End Pos                                                                              | Reference sequence | Observed sequence | Region     | Change | Codon number | Orig. AA | New AA   | Locus Tag | Gene start | Gene stop | Strand                                         | Product | Pyrosequencing results |             |      |      | Found in WT |
|----------|-----------|--------------------------------------------------------------------------------------|--------------------|-------------------|------------|--------|--------------|----------|----------|-----------|------------|-----------|------------------------------------------------|---------|------------------------|-------------|------|------|-------------|
|          |           |                                                                                      |                    |                   |            |        |              |          |          |           |            |           |                                                |         | # reads fwd            | # reads rev | #Var | #Tot |             |
| CP000568 | 2239488   | 2239488 T                                                                            |                    | C                 | SYN        | One    | 205 E        | G        | Che1886  | 2232455   | 2240081-   |           | Integrase, catalytic region                    | 2       | 1                      | 3           | 3    | 100  |             |
| CP000568 | 3373201   | 3373201 AAGT                                                                         |                    | G                 | NON        | Mul    | 537          | Y        | Che2854A | 3373227   | 3373227    | 1         | conserved hypothetical protein precursor       | 1       | 3                      | 4           | 4    | 100  |             |
| CP000568 | 3373707   | 3373707 T                                                                            |                    | C                 | NON        | Mul    | 149 N        | N        | Che2855  | 3373261   | 3374490+   | 1         | conserved hypothetical protein                 | 1       | 3                      | 4           | 4    | 100  | 3373707     |
| CP000568 | 3379264   | 3379264 G                                                                            |                    | A                 | NON        | One    | 359 D        | N        | Che2860  | 3378190   | 3379900+   | 1         | hypothetical protein precursor                 | 1       | 3                      | 4           | 4    | 100  |             |
| CP000568 | 3786797   | 3786797 T                                                                            |                    | GCA               | INTERGENIC | One    |              |          |          |           |            | 3         |                                                | 1       | 4                      | 4           | 4    | 100  |             |
| CP000568 | 3800424   | 3800424 A                                                                            |                    | G                 | NON        | One    | 277 V        | A        | Che3208  | 3800183   | 3801253-   | 2         | Integrase, catalytic region                    | 2       | 2                      | 4           | 4    | 100  |             |
| CP000568 | 3625227   | 3625227 A                                                                            |                    | A                 | SYN        | One    | 1433 P       | P        | Che3078  | 3625229   | 3632170+   | 4         | cellulosome anchoring protein, cohesin region  | 4       | 1                      | 5           | 5    | 100  |             |
| CP000568 | 3786785   | 3786793 GAAGCTATG                                                                    |                    | T                 | INTERGENIC | One    |              |          |          |           |            | 2         |                                                | 2       | 5                      | 5           | 100  |      |             |
| CP000568 | 157500    | 157500 A                                                                             |                    | G                 | NON        | One    | 350 R        | R        | Che0128  | 156451    | 157563+    | 4         | Integrase, catalytic region                    | 4       | 2                      | 6           | 6    | 100  |             |
| CP000568 | 3373046   | 3373067 TTATGGGGTTCGCTCAAGA                                                          |                    | G                 | SYN        | One    | 553 L        | -        | Che2854  | 3371390   | 3373237+   | 4         | conserved hypothetical protein precursor       | 4       | 3                      | 7           | 7    | 100  | 3373046     |
| CP000568 | 3379279   | 3379279 A                                                                            |                    | G                 | NON        | One    | 364 T        | A        | Che2860  | 3378190   | 3379900+   | 3         | hypothetical protein precursor                 | 3       | 4                      | 7           | 7    | 100  |             |
| CP000568 | 816559    | 816559 G                                                                             |                    | A                 | SYN        | One    | 252 P        | P        | Che0661  | 815804    | 817519+    | 1         | Ricin B lectin                                 | 1       | 3                      | 8           | 8    | 100  |             |
| CP000568 | 2245692   | 2245692 A                                                                            |                    | G                 | NON        | Mul    | 400 C        | C        | Che1890  | 2244759   | 2246891+   | 4         | cellulosome enzyme, dockerin type I            | 4       | 4                      | 8           | 8    | 100  |             |
| CP000568 | 2245718   | 2245720 TTG                                                                          |                    | CTT               | NON        | Mul    | 392 N        | -        | Che1890  | 2244759   | 2246891+   | 4         | cellulosome enzyme, dockerin type I            | 4       | 4                      | 8           | 8    | 100  |             |
| CP000568 | 3351245   | 3351245 A                                                                            |                    | G                 | SYN        | One    | 358 E        | E        | Che2834  | 3350172   | 3351857+   | 4         | conserved hypothetical protein precursor       | 4       | 4                      | 8           | 8    | 100  |             |
| CP000568 | 3790320   | 3790395 AACTAGATTGCGAAAAGCCTGCCACATTCGCAGTGCACAAGGTGTTGAAGTGGACTTCCAGTAAACAAAGGATTTG |                    | T                 | INTERGENIC | Del    |              |          |          |           |            | 4         |                                                | 4       | 8                      | 8           | 100  |      |             |
| CP000568 | 1675440   | 1675440 C                                                                            |                    | C                 | SYN        | One    | 511 T        | T        | Che1373  | 1671219   | 1676972-   | 4         | YD repeat protein                              | 4       | 4                      | 8           | 8    | 100  |             |
| CP000568 | 1675446   | 1675446 C                                                                            |                    | C                 | SYN        | One    | 509 A        | A        | Che1373  | 1671219   | 1676972-   | 4         | YD repeat protein                              | 4       | 5                      | 9           | 9    | 100  |             |
| CP000568 | 1855353   | 1855353 T                                                                            |                    | C                 | NON        | One    | 214 Y        | C        | Che1529  | 1854740   | 1855992-   | 4         | transposase                                    | 4       | 5                      | 9           | 9    | 100  |             |
| CP000568 | 3379321   | 3379321 A                                                                            |                    | G                 | NON        | One    | 378 T        | A        | Che2860  | 3378190   | 3379900+   | 4         | hypothetical protein precursor                 | 4       | 5                      | 9           | 9    | 100  |             |
| CP000568 | 3379335   | 3379335 C                                                                            |                    | G                 | NON        | One    | 382 C        | C        | Che2860  | 3378190   | 3379900+   | 4         | hypothetical protein precursor                 | 4       | 5                      | 9           | 9    | 100  |             |
| CP000568 | 3623485   | 3623487 TCC                                                                          |                    | GAA               | NON        | One    | 1324 S       | -        | Che3077  | 3619516   | 3625077+   | 5         | cellulosome anchoring protein, cohesin region  | 5       | 4                      | 9           | 9    | 100  |             |
| CP000568 | 5374106   | 5374106 A                                                                            |                    | G                 | SYN        | One    | 282 R        | R        | Che2855  | 3373261   | 3374490+   | 5         | conserved hypothetical protein                 | 5       | 5                      | 10          | 10   | 100  | 3374106     |
| CP000568 | 628597    | 628597 G                                                                             |                    | A                 | NON        | One    | 326 A        | T        | Che0514  | 627622    | 628737+    | 5         | DNA methylase N-4-N-6                          | 5       | 5                      | 10          | 10   | 100  |             |
| CP000568 | 1231266   | 1231266 G                                                                            |                    | A                 | NON        | One    | 272 A        | V        | Che1029  | 1231004   | 1232080-   | 4         | phosphate acetyltransferase                    | 4       | 6                      | 10          | 10   | 100  |             |
| CP000568 | 2137485   | 2137485 G                                                                            |                    | A                 | SYN        | Mul    | 663 T        | T        | Che1806  | 2132940   | 2139473-   | 3         | cellulosome enzyme, dockerin type I            | 3       | 7                      | 10          | 10   | 100  |             |
| CP000568 | 2137527   | 2137527 T                                                                            |                    | C                 | SYN        | One    | 649 L        | L        | Che1806  | 2132940   | 2139473-   | 3         | cellulosome enzyme, dockerin type I            | 3       | 5                      | 10          | 10   | 100  |             |
| CP000568 | 3379345   | 3379345 A                                                                            |                    | C                 | NON        | One    | 336 R        | R        | Che2860  | 3378190   | 3379900+   | 4         | hypothetical protein precursor                 | 4       | 6                      | 10          | 10   | 100  |             |
| CP000568 | 56259     | 56259 A                                                                              |                    | G                 | NON        | One    | 629 P        | P        | Che0043  | 54373     | 56601+     | 3         | glycoside hydrolase, family 9                  | 3       | 8                      | 11          | 11   | 100  |             |
| CP000568 | 533551    | 533551 A                                                                             |                    | G                 | NON        | One    | 734 H        | R        | Che0423  | 531351    | 533972+    | 6         | iron-containing alcohol dehydrogenase          | 6       | 5                      | 11          | 11   | 100  |             |
| CP000568 | 1460496   | 1460496 T                                                                            |                    | C                 | NON        | One    | 1243 E       | G        | Che1221  | 1455455   | 1464223-   | 4         | glycosyltransferase 36                         | 4       | 5                      | 11          | 11   | 100  |             |
| CP000568 | 1897171   | 1897171 G                                                                            |                    | A                 | NON        | One    | 211 R        | Q        | Che1671  | 1996540   | 1998108+   | 7         | Recombinase                                    | 7       | 7                      | 14          | 14   | 100  |             |
| CP000568 | 2012225   | 2012225 T                                                                            |                    | C                 | INTERGENIC | One    |              |          |          |           |            | 7         |                                                | 7       | 4                      | 11          | 11   | 100  |             |
| CP000568 | 2137509   | 2137509 C                                                                            |                    | T                 | SYN        | One    | 655 S        | S        | Che1806  | 2132940   | 2139473-   | 5         | cellulosome enzyme, dockerin type I            | 5       | 6                      | 11          | 11   | 100  |             |
| CP000568 | 3526732   | 3526732 C                                                                            |                    | G                 | NON        | One    | 77 C         | F        | Che3003  | 3525027   | 3526961-   | 6         | hydrogenases, Fe-only                          | 6       | 5                      | 11          | 11   | 100  |             |
| CP000568 | 3532242   | 3532242 A                                                                            |                    | G                 | NON        | One    | 116 F        | S        | Che3008  | 3531917   | 3532588-   | 7         | Superoxide dismutase                           | 7       | 4                      | 11          | 11   | 100  |             |
| CP000568 | 401007    | 401007 C                                                                             |                    | T                 | NON        | One    | 124 G        | S        | Che0317  | 400705    | 401376+    | 4         | hypothetical protein                           | 4       | 8                      | 12          | 12   | 100  |             |
| CP000568 | 410756    | 410756 A                                                                             |                    | G                 | SYN        | One    | 53 T         | T        | Che2855  | 410598    | 412538+    | 5         | NAD+ synthetase                                | 5       | 7                      | 12          | 12   | 100  |             |
| CP000568 | 537435    | 537435 A                                                                             |                    | G                 | SYN        | One    | 248 K        | K        | Che0427  | 536692    | 537861+    | 4         | serine phosphatase                             | 4       | 8                      | 12          | 12   | 100  |             |
| CP000568 | 763262    | 763262 G                                                                             |                    | A                 | NON        | One    | 61 P         | L        | Che0622  | 762637    | 763443+    | 5         | methylthioadenosine phosphorylase              | 5       | 7                      | 12          | 12   | 100  |             |
| CP000568 | 939962    | 939962 A                                                                             |                    | -                 | NON        | Del    | 660 F        | -        | Che0777  | 939329    | 941941-    | 3         | DNA mismatch repair protein MutS               | 3       | 9                      | 12          | 12   | 100  |             |
| CP000568 | 950504    | 950504 G                                                                             |                    | A                 | SYN        | One    | 74 V         | V        | Che0789  | 954484    | 955275-    | 8         | DNA-binding S4                                 | 8       | 4                      | 12          | 12   | 100  |             |
| CP000568 | 1311107   | 1311107 A                                                                            |                    | G                 | NON        | One    | 324 H        | K        | Che1101  | 1310786   | 1312078+   | 8         | hypothetical protein                           | 8       | 7                      | 12          | 12   | 100  |             |
| CP000568 | 1606832   | 1606832 T                                                                            |                    | C                 | NON        | One    | 24 E         | G        | Che1323  | 1606222   | 1606902-   | 6         | GpC protein                                    | 6       | 7                      | 12          | 12   | 100  |             |
| CP000568 | 1818170   | 1818170 C                                                                            |                    | T                 | SYN        | One    | 461 A        | A        | Che1498  | 1817744   | 1819552-   | 9         | methyl-accepting chemotaxis sensory transducer | 9       | 3                      | 12          | 12   | 100  |             |
| CP000568 | 2504381   | 2504381 T                                                                            |                    | C                 | NON        | Mul    | 807 H        | R        | Che2109  | 2504263   | 2506800-   | 4         | copper amine oxidase-like                      | 4       | 8                      | 12          | 12   | 100  |             |
| CP000568 | 37536     | 37536 G                                                                              |                    | T                 | NON        | One    | 223 A        | S        | Che0030  | 36870     | 37580+     | 6         | phosphatidate cytidyltransferase               | 6       | 7                      | 13          | 13   | 100  |             |
| CP000568 | 462588    | 462588 G                                                                             |                    | G                 | SYN        | One    | 243 V        | V        | Che0367  | 461825    | 462694+    | 5         | NAD(P)-dependent coenzyme F420-dependent       | 5       | 9                      | 13          | 13   | 100  |             |
| CP000568 | 535432    | 535432 C                                                                             |                    | T                 | NON        | One    | 135 L        | L        | Che0426  | 535029    | 536690+    | 9         | putative PAS/PAC sensor protein                | 9       | 4                      | 13          | 13   | 100  |             |
| CP000568 | 921216    | 921216 T                                                                             |                    | C                 | NON        | One    | 174 N        | D        | Che0755  | 920548    | 921735-    | 9         | aminotransferase, class I and II               | 9       | 4                      | 13          | 13   | 100  |             |
| CP000568 | 1194244   | 1194244 G                                                                            |                    | A                 | SYN        | One    | 350 L        | L        | Che0997  | 1194233   | 1195291-   | 5         | 1-hydroxy-2-methyl-2-(E)-butenyl 4-diphosphate | 5       | 8                      | 13          | 13   | 100  |             |
| CP000568 | 1633288   | 1633288 G                                                                            |                    | A                 | NON        | One    | 281 P        | L        | Che1341  | 1632612   | 1634129-   | 4         | Radical SAM                                    | 4       | 9                      | 13          | 13   | 100  |             |
| CP000568 | 1713360   | 1713360 TTGATAAAATAAACAAATTTCTGTGTAGATAGTTTTATCGTACCTATGAGGAAATGAAACT                |                    | T                 | INTERGENIC | Del    |              |          |          |           |            | 8         |                                                | 8       | 5                      | 13          | 13   | 100  |             |
| CP000568 | 1770389   | 1770389 T                                                                            |                    | C                 | NON        | One    | 254 E        | G        | Che1450  | 1770387   | 1771149-   | 8         | conserved hypothetical protein                 | 8       | 5                      | 13          | 13   | 100  |             |
| CP000568 | 1872581   | 1872581 C                                                                            |                    | T                 | INTERGENIC | One    |              |          |          |           |            | 8         |                                                | 8       | 9                      | 13          | 13   | 100  |             |
| CP000568 | 1953853   | 1953853-                                                                             |                    | G                 | SYN        | Ins    | 44 G         | G        | Che1625  | 1953574   | 1953984-   | 7         | phage protein, HK97 gp10 family                | 7       | 6                      | 13          | 13   | 100  |             |
| CP000568 | 2491691   | 2491691 C                                                                            |                    | T                 | SYN        | One    | 43 S         | S        | Che2095  | 2491052   | 2491819-   | 8         | hydrolase, TaD family                          | 8       | 5                      | 13          | 13   | 100  |             |
| CP000568 | 2595580   | 2595580 T                                                                            |                    | C                 | NON        | One    | 186 D        | G        | Che2179  | 2593348   | 2596116-   | 5         | Pectate lyase/Amb allergen                     | 5       | 8                      | 13          | 13   | 100  |             |
| CP000568 | 164619    | 164619 A                                                                             |                    | G                 | INTERGENIC | One    |              |          |          |           |            | 10        |                                                | 4       | 14                     | 14          | 100  |      |             |
| CP000568 | 356311    | 356311 C                                                                             |                    | T                 | SYN        | One    | 389 V        | V        | Che0287  | 355145    | 358627+    | 9         | multi-sensor hybrid histidine kinase           | 9       | 5                      | 14          | 14   | 100  |             |
| CP000568 | 432634    | 432634 A                                                                             |                    | G                 | SYN        | One    | 137 A        | A        | Che0343  | 432224    | 432826+    | 7         | flavin reductase-like, FMN-binding             | 7       | 6                      | 14          | 14   | 100  |             |
| CP000568 | 488363    | 488391 TATCGAGGAATATATACTACGTGGGAAGC                                                 |                    | -                 | NON        | Del    | 1921         | -        | Che0392  | 487789    | 488838+    | 8         | inner-membrane translocator                    | 8       | 7                      | 14          | 14   | 100  |             |
| CP000568 | 903250    | 903250 V                                                                             |                    | G                 | SYN        | One    | 270 V        | V        | Che0486  | 903047    | 903496+    | 5         | GTP-binding signal recognition particle SRP54  | 5       | 9                      | 14          | 14   | 100  |             |
| CP000568 | 933177    | 933177 A                                                                             |                    | G                 | NON        | One    | 208 T        | T        | Che0770  | 932459    | 933790-    | 3         | signal recognition particle protein            | 3       | 11                     | 14          | 14   | 100  |             |
| CP000568 | 1012867   | 1012867 G                                                                            |                    | A                 | NON        | One    | 146 V        | V        | Che0831  | 1012416   | 1013303-   | 6         | Polyprenyl synthetase                          | 6       | 8                      | 14          | 14   | 100  |             |
| CP000568 | 1088      |                                                                                      |                    |                   |            |        |              |          |          |           |            |           |                                                |         |                        |             |      |      |             |

|          |         |                                                                           |   |            |     |        |         |         |         |          |                                                 |                                    |    |    |     |     |     |
|----------|---------|---------------------------------------------------------------------------|---|------------|-----|--------|---------|---------|---------|----------|-------------------------------------------------|------------------------------------|----|----|-----|-----|-----|
| CP000568 | 1678574 | 1678574 C                                                                 | T | NON        | One | 322 G  | S       | Che1375 | 1678188 | 1679537  | aspartate kinase                                | 8                                  | 9  | 17 | 17  | 100 |     |
| CP000568 | 1778192 | 1778192 A                                                                 | - | NON        | Del | 9 L    | -       | Che1458 | 1777408 | 1778217  | extracellular solute-binding protein, family 3  | 11                                 | 6  | 17 | 17  | 100 |     |
| CP000568 | 1821198 | 1821198 T                                                                 | - | NON        | One | 216 W  | R       | Che1499 | 1820553 | 1822307+ | ammonium transporter                            | 7                                  | 7  | 17 | 17  | 100 |     |
| CP000568 | 2141861 | 2141861 G                                                                 | A | NON        | One | 307 A  | V       | Che1807 | 2141116 | 2142780- | conserved hypothetical protein                  | 9                                  | 8  | 17 | 17  | 100 |     |
| CP000568 | 2460536 | 2460536 T                                                                 | - | INTERGENIC | One |        |         |         |         |          |                                                 | 7                                  | 10 | 17 | 17  | 100 |     |
| CP000568 | 2657596 | 2657596 C                                                                 | T | NON        | One | 84 G   | D       | Che2229 | 2656764 | 2657616  | N-acetylneuraminate synthase                    | 7                                  | 10 | 17 | 17  | 100 |     |
| CP000568 | 2661872 | 2661872 A                                                                 | G | SYN        | One | 103 L  | L       | Che2234 | 2661795 | 2662178- | hypothetical protein                            | 10                                 | 7  | 17 | 17  | 100 |     |
| CP000568 | 2775727 | 2775727 T                                                                 | C | NON        | One | 153 H  | R       | Che2329 | 2775348 | 2776184- | hypothetical protein                            | 7                                  | 10 | 17 | 17  | 100 |     |
| CP000568 | 2920132 | 2920132 T                                                                 | C | NON        | One | 193 P  | P       | Che2448 | 2919555 | 2920538+ | inner-membrane translocator                     | 7                                  | 10 | 17 | 17  | 100 |     |
| CP000568 | 3458321 | 3458321 G                                                                 | A | NON        | One | 209 A  | T       | Che2943 | 3457697 | 3458914+ | ABC-2 type transporter                          | 8                                  | 9  | 17 | 17  | 100 |     |
| CP000568 | 3496333 | 3496333 G                                                                 | A | NON        | One | 245 E  | K       | Che2977 | 3495704 | 3496701+ | MAE3L putative                                  | 7                                  | 17 | 17 | 100 |     |     |
| CP000568 | 3752468 | 3752468 A                                                                 | G | NON        | One | 181 T  | T       | Che3174 | 3752151 | 3752520- | conserved hypothetical protein                  | 6                                  | 11 | 17 | 17  | 100 |     |
| CP000568 | 3373938 | 3373938 A                                                                 | G | SYN        | One | 226 G  | G       | Che2855 | 3373261 | 3374499+ | conserved hypothetical protein                  | 6                                  | 12 | 18 | 18  | 100 |     |
| CP000568 | 1463053 | 1463053 T                                                                 | C | NON        | One | 391 T  | A       | Che1221 | 1455455 | 1464223- | glycosyltransferase 36                          | 7                                  | 11 | 18 | 18  | 100 |     |
| CP000568 | 232355  | 232355 A                                                                  | G | NON        | One | 523 T  | A       | Che0191 | 230789  | 232588+  | proteinase inhibitor I4, serpin                 | 10                                 | 8  | 18 | 18  | 100 |     |
| CP000568 | 580832  | 580832 C                                                                  | G | A          | NON | One    | 4 G     | S       | Che0466 | 580923   | 581945+                                         | flagellar motor switch protein FIG | 7  | 11 | 18  | 18  | 100 |
| CP000568 | 881843  | 881843 A                                                                  | A | INTERGENIC | One |        |         |         |         |          |                                                 | 7                                  | 11 | 18 | 18  | 100 |     |
| CP000568 | 815352  | 815352 C                                                                  | A | T          | NON | One    | 692 T   | M       | Che0660 | 813278   | 815599+                                         | glycoside hydrolase, family 81     | 11 | 7  | 18  | 18  | 100 |
| CP000568 | 915475  | 915475 A                                                                  | G | NON        | One | 213 V  | A       | Che0749 | 915285  | 916112-  | binding-protein-dependent transport systems     | 12                                 | 6  | 18 | 18  | 100 |     |
| CP000568 | 1072740 | 1072740 C                                                                 | T | NON        | One | 466 E  | K       | Che0896 | 1072333 | 1074135- | DNA primase                                     | 6                                  | 12 | 18 | 18  | 100 |     |
| CP000568 | 1400010 | 1400010 G                                                                 | A | NON        | One | 177 I  | I       | Che1172 | 1399482 | 1400630+ | protein of unknown function DUF362              | 9                                  | 9  | 18 | 18  | 100 |     |
| CP000568 | 1552089 | 1552089 C                                                                 | T | NON        | One | 152 H  | K       | Che1275 | 1521754 | 1552191- | H+-ATPase subunit H                             | 8                                  | 10 | 18 | 18  | 100 |     |
| CP000568 | 1625686 | 1625686 C                                                                 | G | NON        | One | 409 I  | I       | Che1334 | 1624461 | 1626023+ | FHA domain containing protein                   | 10                                 | 8  | 18 | 18  | 100 |     |
| CP000568 | 1645595 | 1645595 T                                                                 | C | SYN        | One | 21 V   | V       | Che1352 | 1644326 | 1645657- | UDP-glucose 6-dehydrogenase                     | 10                                 | 8  | 18 | 18  | 100 |     |
| CP000568 | 1734027 | 1734027 G                                                                 | C | NON        | One | 33 Q   | R       | Che1413 | 1732208 | 1734124- | hypothetical protein                            | 12                                 | 6  | 18 | 18  | 100 |     |
| CP000568 | 1943396 | 1943396 T                                                                 | C | NON        | One | 461 D  | G       | Che1613 | 1942044 | 1944767- | glycosyl hydrolase-like                         | 10                                 | 8  | 18 | 18  | 100 |     |
| CP000568 | 2033223 | 2033223 G                                                                 | A | NON        | One | 412 T  | T       | Che1609 | 2031877 | 2034156- | Phage-related protein-like                      | 9                                  | 9  | 18 | 18  | 100 |     |
| CP000568 | 2139279 | 2139279 G                                                                 | A | NON        | One | 65 G   | G       | Che1806 | 2132940 | 2139473- | cellulose enzyme, dockerin type I               | 10                                 | 8  | 18 | 18  | 100 |     |
| CP000568 | 2419590 | 2419590 C                                                                 | T | INTERGENIC | One |        |         |         |         |          |                                                 | 10                                 | 8  | 18 | 18  | 100 |     |
| CP000568 | 2739844 | 2739912 TTTCAATTCCTACAGTACGATAAAAACCCATTAGATAGAGAATTGAAAAATCGCTGCAAATGATA | - | INTERGENIC | Del | 317 A  | T       | Che2550 | 3019150 | 3020133- | glycosyltransferase sugar-binding region        | 8                                  | 10 | 18 | 18  | 100 |     |
| CP000568 | 3019185 | 3019185 C                                                                 | T | NON        | Mul | 22 R   | R       | Che2574 | 3046452 | 3047264+ | binding-protein-dependent transport systems     | 15                                 | 3  | 18 | 18  | 100 |     |
| CP000568 | 3046517 | 3046517 T                                                                 | C | SYN        | Ins | 62 G   | G       | Che2808 | 3309546 | 3310583+ | transcriptional regulator, LacI family          | 9                                  | 9  | 18 | 18  | 100 |     |
| CP000568 | 3309731 | 3309731 C                                                                 | A | NON        | One | 17 A   | V       | Che2917 | 3440034 | 3440432+ | ribosomal protein S8                            | 10                                 | 8  | 18 | 18  | 100 |     |
| CP000568 | 3440083 | 3440083 C                                                                 | T | NON        | One | 271 T  | A       | Che3096 | 3653111 | 3654046- | hypothetical protein                            | 3                                  | 15 | 18 | 18  | 100 |     |
| CP000568 | 3653236 | 3653236 T                                                                 | - | INTERGENIC | Del |        |         |         |         |          |                                                 | 10                                 | 9  | 19 | 19  | 100 |     |
| CP000568 | 92472   | 92472 A                                                                   | - | STOP       | One | 328 Q  | *       | Che0208 | 252608  | 254899+  | single-stranded-DNA-specific exonuclease RecJ   | 7                                  | 12 | 19 | 19  | 100 |     |
| CP000568 | 253589  | 253589 C                                                                  | G | SYN        | One | 66 S   | S       | Che0298 | 372821  | 374623+  | methyl-accepting chemotaxis sensory transducer  | 9                                  | 10 | 19 | 19  | 100 |     |
| CP000568 | 373018  | 373018 A                                                                  | G | NON        | One | 144 A  | V       | Che0406 | 507482  | 508219-  | conserved hypothetical protein                  | 9                                  | 10 | 19 | 19  | 100 |     |
| CP000568 | 507789  | 507789 G                                                                  | A | NON        | Mul | 119 N  | D       | Che0511 | 623795  | 625117+  | histidine kinase                                | 11                                 | 8  | 19 | 19  | 100 |     |
| CP000568 | 624149  | 624149 A                                                                  | G | NON        | One | 303 M  | V       | Che0561 | 689831  | 689977+  | AbpE-like lipoprotein                           | 10                                 | 9  | 19 | 19  | 100 |     |
| CP000568 | 689837  | 689837 A                                                                  | - | INTERGENIC | Del |        |         |         |         |          |                                                 | 13                                 | 6  | 19 | 19  | 100 |     |
| CP000568 | 1031281 | 1031281 A                                                                 | G | SYN        | One | 179 A  | A       | Che1077 | 1284358 | 1284987+ | hypothetical protein                            | 7                                  | 10 | 19 | 19  | 100 |     |
| CP000568 | 1284894 | 1284894 C                                                                 | T | NON        | One | 75 C   | C       | Che1776 | 2098068 | 2098553- | protein of unknown function UPF0079             | 10                                 | 9  | 19 | 19  | 100 |     |
| CP000568 | 2098330 | 2098330 T                                                                 | C | NON        | Ins | 62 I   | I       | Che1811 | 2147403 | 2147777- | transcriptional repressor, CopY family          | 9                                  | 10 | 19 | 19  | 100 |     |
| CP000568 | 2147594 | 2147594- A                                                                | A | NON        | One | 125 D  | N       | Che1889 | 2238441 | 2239103+ | phage integrase-like SAM-like                   | 9                                  | 10 | 19 | 19  | 100 |     |
| CP000568 | 2238813 | 2238813 G                                                                 | A | SYN        | One | 563 T  | T       | Che1917 | 2285111 | 2287708- | ATPase P-type (transporting), HAD superfamily,  | 12                                 | 7  | 19 | 19  | 100 |     |
| CP000568 | 2478733 | 2478733 C                                                                 | T | NON        | One | 745 N  | D       | Che2086 | 2478446 | 2480955- | peptidase U32                                   | 12                                 | 7  | 19 | 19  | 100 |     |
| CP000568 | 2713030 | 2713030 G                                                                 | A | NON        | One | 146 R  | W       | Che2282 | 2712653 | 2713465- | MCP methyltransferase, CheR-type                | 8                                  | 11 | 19 | 19  | 100 |     |
| CP000568 | 3001848 | 3001848 G                                                                 | A | NON        | One | 103 D  | N       | Che2532 | 3001542 | 3002390+ | sulfate ABC transporter, inner membrane subunit | 11                                 | 8  | 19 | 19  | 100 |     |
| CP000568 | 3094111 | 3094111 G                                                                 | A | NON        | One | 1103 D | N       | Che2612 | 3087105 | 3090941+ | Fibronectin, type III                           | 9                                  | 10 | 19 | 19  | 100 |     |
| CP000568 | 3132489 | 3132489 C                                                                 | T | NON        | One | 368 P  | P       | Che2650 | 3131748 | 3133571- | polysaccharide biosynthesis protein CapD        | 8                                  | 9  | 19 | 19  | 100 |     |
| CP000568 | 3227821 | 3227821 G                                                                 | A | NON        | One | 258 V  | I       | Che2736 | 3227050 | 3228756+ | phosphoenolpyruvate-protein phosphotransferase  | 11                                 | 8  | 19 | 19  | 100 |     |
| CP000568 | 3236755 | 3236755 A                                                                 | G | INTERGENIC | One |        |         |         |         |          |                                                 | 11                                 | 8  | 19 | 19  | 100 |     |
| CP000568 | 3811733 | 3811733 A                                                                 | G | NON        | One | 37 D   | G       | Che3217 | 3811624 | 3812916+ | hypothetical protein                            | 7                                  | 12 | 19 | 19  | 100 |     |
| CP000568 | 136133  | 136133 C                                                                  | G | NON        | One | 35 D   | G       | Che0104 | 136300  | 137127+  | riboflavin biosynthesis protein RibD            | 8                                  | 12 | 20 | 20  | 100 |     |
| CP000568 | 351245  | 351245 G                                                                  | A | SYN        | One | 143 P  | P       | Che0284 | 350817  | 352175+  | protein of unknown function DUF815              | 11                                 | 7  | 20 | 20  | 100 |     |
| CP000568 | 556152  | 556152 C                                                                  | T | INTERGENIC | One |        |         |         |         |          |                                                 | 9                                  | 11 | 20 | 20  | 100 |     |
| CP000568 | 613076  | 613076 A                                                                  | G | SYN        | One | 44 S   | S       | Che0502 | 612945  | 613811+  | hypothetical protein                            | 11                                 | 9  | 20 | 20  | 100 |     |
| CP000568 | 812836  | 812836 A                                                                  | - | NON        | Del | 1 L    | -       | Che0659 | 812448  | 812837-  | conserved hypothetical protein                  | 11                                 | 9  | 20 | 20  | 100 |     |
| CP000568 | 1332697 | 1332697 T                                                                 | C | SYN        | One | 127 S  | S       | Che1116 | 1330912 | 1333077- | HMG-I and HMG-V, DNA-binding                    | 10                                 | 10 | 20 | 20  | 100 |     |
| CP000568 | 1530897 | 1530897 T                                                                 | C | NON        | One | 1431 M | M       | Che1302 | 1579458 | 1581125- | conserved hypothetical protein                  | 9                                  | 11 | 20 | 20  | 100 |     |
| CP000568 | 1583731 | 1583731 T                                                                 | C | NON        | One | 280 K  | E       | Che1304 | 1583135 | 1584508- | Pf6H-like protein                               | 11                                 | 9  | 20 | 20  | 100 |     |
| CP000568 | 1796657 | 1796657 T                                                                 | C | INTERGENIC | One |        |         |         |         |          |                                                 | 6                                  | 14 | 20 | 20  | 100 |     |
| CP000568 | 2168008 | 2168008 T                                                                 | C | NON        | One | 485 D  | G       | Che1829 | 2166165 | 2169461- | Chromosome segregation ATPases-like             | 11                                 | 11 | 20 | 20  | 100 |     |
| CP000568 | 2386244 | 2386244 A                                                                 | G | NON        | Mul | 136 L  | F       | Che2006 | 2386594 | 2386649- | hypothetical protein precursor                  | 5                                  | 15 | 20 | 20  | 100 |     |
| CP000568 | 2517922 | 2517922 T                                                                 | C | NON        | One | 2751 V | V       | Che2121 | 2516821 | 2518814+ | glycoside hydrolase, family 10                  | 11                                 | 9  | 20 | 20  | 100 |     |
| CP000568 | 2892640 | 2892640 C                                                                 | T | NON        | One | 58 P   | S       | Che2263 | 2892469 | 2892936+ | H+-transporting two-sector ATPase, C subunit    | 6                                  | 14 | 20 | 20  | 100 |     |
| CP000568 | 2971415 | 2971415 T                                                                 | C | NON        | One | 25 D   | G       | Che2504 | 2970199 | 2971488- | 3D                                              | 9                                  | 11 | 20 | 20  | 100 |     |
| CP000568 | 3031718 | 3031718 G                                                                 | A | STOP       | One | 156 W  | *       | Che2560 | 3031251 | 3031799+ | dTDP-4-dehydrohamose 3,5-epimerase              | 11                                 | 9  | 20 | 20  | 100 |     |
| CP000568 | 3064045 | 3064045 G                                                                 | A | INTERGENIC | One |        |         |         |         |          |                                                 | 11                                 | 9  | 20 | 20  | 100 |     |
| CP000568 | 3082151 | 3082151 A                                                                 | G | SYN        | One | 9 V    | V       | Che2803 | 3304204 | 3304983+ | binding-protein-dependent transport systems     | 5                                  | 15 | 20 | 20  | 100 |     |
| CP000568 | 3304230 | 3304230 A                                                                 | G | NON        | One | 51 D   | N       | Che2927 | 3445723 | 3445941+ | translation initiation factor IF-1              | 11                                 | 9  | 20 | 20  | 100 |     |
| CP000568 | 345873  | 345873 G                                                                  | A | NON        | One | 224 F  | V       | Che2966 | 3484611 | 3485357+ | hypothetical protein                            | 10                                 | 9  | 20 | 20  | 100 |     |
| CP000568 | 3485280 | 3485280 T                                                                 | G | NON        | One | 494*   | Q       | Che3004 | 3526995 | 3528476- | ferredoxin                                      | 13                                 | 7  | 20 | 20  | 100 |     |
| CP000568 | 3626997 | 3626997 A                                                                 | G | NON        | One | 167 D  | D       | Che3096 | 3607660 | 3608385+ | ABC transporter related                         | 9                                  | 11 | 20 | 20  | 100 |     |
| CP000568 | 3608159 | 3608159 A                                                                 | G | SYN        | One | 178 V  | V       | Che3158 | 3678143 | 3677156+ | conserved hypothetical protein                  | 9                                  | 12 | 20 | 20  | 100 |     |
| CP000568 | 3731348 | 3731348 G                                                                 | A | SYN        | One | 380 A  | V       | Che0071 | 3730815 | 3732743+ | putative acrilonate hydratase                   | 10                                 | 10 | 20 | 20  | 100 |     |
| CP000568 | 104530  | 104530 G                                                                  | A | NON        | One | 102852 | 105668- | Che0071 | 102852  | 105668-  | Cellulose 1,4-beta-cellobiosidase               | 10                                 | 11 | 21 | 21  | 100 |     |
| CP000568 | 531270  | 531270 T                                                                  | C | NON        | One | 195 M  | T       | Che0422 | 530687  | 531370+  | CoA-binding                                     | 13                                 | 8  | 21 | 21  | 100 |     |
| CP000568 | 632372  | 632372 C                                                                  | G | NON        | One | 9 V    | L       | Che0517 | 632019  | 632387-  | hypothetical protein                            | 6                                  | 15 | 21 | 21  | 100 |     |
| CP000568 | 1080738 | 1080738 A                                                                 | G | NON        | One | 34 L   | F       | Che0903 | 1073983 | 1080837- | protein-export membrane protein SecF            | 14                                 | 7  | 21 | 21  | 100 |     |
| CP000568 | 1113552 | 1113552 T                                                                 | C | NON        | One | 959 T  | A       | Che0927 | 1112854 | 1116426- | chromosome segregation protein SMC              | 10                                 | 11 | 21 | 21  | 100 |     |
| CP000568 | 1141582 | 1141582 A                                                                 | G | SYN        | One | 304 H  | H       | Che0952 | 114     |          |                                                 |                                    |    |    |     |     |     |

|          |         |           |   |            |     |      |   |         |         |          |                                                                                               |    |    |    |      |     |
|----------|---------|-----------|---|------------|-----|------|---|---------|---------|----------|-----------------------------------------------------------------------------------------------|----|----|----|------|-----|
| CP000568 | 385361  | 385361 A  | G | SYN        | One | 75   | G | Che0307 | 385137  | 385514+  | conserved hypothetical protein                                                                | 12 | 11 | 23 | 23   | 100 |
| CP000568 | 556255  | 556255 A  | G | INTERGENIC | One |      |   |         |         |          |                                                                                               |    |    |    |      | 100 |
| CP000568 | 1015063 | 1015063 A | G | NON        | One | 76   | S | Che0834 | 1014851 | 1015288- | NusB antitermination factor                                                                   | 7  | 16 | 23 | 23   | 100 |
| CP000568 | 1771468 | 1771468 C | C | NON        | One | 120  | R | Che1451 | 1771353 | 1771826- | GCN5-related N-acetyltransferase                                                              | 14 | 9  | 23 | 23   | 100 |
| CP000568 | 1917309 | 1917309 T | C | SYN        | One | 159  | P | Che1586 | 1916130 | 1917785- | binding-protein-dependent transport systems                                                   | 12 | 11 | 23 | 23   | 100 |
| CP000568 | 2178645 | 2178645 T | C | SYN        | One | 23   | S | Che1885 | 2175342 | 2178650- | Viral A-type inclusion protein repeat                                                         | 10 | 13 | 23 | 23   | 100 |
| CP000568 | 2210573 | 2210573 C | T | NON        | One | 240  | N | Che1884 | 2209854 | 2210768+ | acetylglutamate kinase                                                                        | 12 | 11 | 23 | 23   | 100 |
| CP000568 | 2795536 | 2795536 G | A | SYN        | One | 73   | T | Che2345 | 2794605 | 2795753+ | DegT/DnrJ/EryC1/StrS aminotransferase                                                         | 14 | 9  | 23 | 23   | 100 |
| CP000568 | 2831640 | 2831640 T | T | NON        | Del | 951  | - | Che2366 | 2831302 | 2831922- | single-stranded nucleic acid binding R3H                                                      | 15 | 8  | 23 | 23   | 100 |
| CP000568 | 2908769 | 2908769 C | T | NON        | One | 55   | R | Che2436 | 2908696 | 2908932- | hypothetical protein                                                                          | 10 | 13 | 23 | 23   | 100 |
| CP000568 | 3116739 | 3116739 C | T | NON        | Del | 801  | L | Che2655 | 3116740 | 3116934+ | pyridoxal 5'-phosphate oxidase-related, HcH4/H-pal aldolase                                   | 15 | 8  | 23 | 23   | 100 |
| CP000568 | 3131416 | 3131416 C | G | SYN        | One | 39   | Q | Che2649 | 3130705 | 3131532- | ATPase, P-type (transporting), HAD superfamily, hydrogenase expression/formation protein HyeP | 10 | 13 | 23 | 23   | 100 |
| CP000568 | 3147607 | 3147607 A | T | NON        | One | 97   | A | Che3013 | 3537193 | 3538170- | Rubredoxin-type Fe(Cys)4 protein                                                              | 10 | 13 | 23 | 23   | 100 |
| CP000568 | 3537881 | 3537881 G | A | SYN        | One | 62   | A | Che0063 | 96121   | 96456+   | copper amine oxidase-like                                                                     | 17 | 7  | 24 | 24   | 100 |
| CP000568 | 96306   | 96306 A   | A | INTERGENIC | One | 392  | N | Che0744 | 909693  | 909809-  |                                                                                               | 9  | 15 | 24 | 24   | 100 |
| CP000568 | 908630  | 908630 G  | A | NON        | One | 427  | C | Che1041 | 1244775 | 1246175- | UDP-N-acetylmuramoylalanine-D-glutamate ligase                                                | 9  | 15 | 24 | 24   | 100 |
| CP000568 | 1006265 | 1006265 T | A | SYN        | One | 334  | V | Che1344 | 1635311 | 1637485- | (pp)Gpp synthetase I, Spo7RrelA                                                               | 12 | 12 | 24 | 24   | 100 |
| CP000568 | 1244897 | 1244897 G | T | STOP       | One | 363  | W | Che1509 | 1833063 | 1834298- | protein of unknown function DUF438                                                            | 8  | 16 | 24 | 24   | 100 |
| CP000568 | 1636484 | 1636484 T | G | NON        | One | 146  | S | Che1800 | 2126418 | 2127239+ | Peptidoglycan-binding LysoM                                                                   | 11 | 13 | 24 | 24   | 100 |
| CP000568 | 1833211 | 1833211 C | A | NON        | One | 151  | L | Che1942 | 2317632 | 2318531+ | hypothetical protein                                                                          | 12 | 14 | 24 | 24   | 100 |
| CP000568 | 2126854 | 2126854 A | G | INTERGENIC | One |      |   |         |         |          |                                                                                               |    |    |    |      | 100 |
| CP000568 | 2318380 | 2318380 G | A | SYN        | One | 390  | D | Che2412 | 2879144 | 2881795+ | SMC protein-like                                                                              | 12 | 12 | 24 | 24   | 100 |
| CP000568 | 2362406 | 2362406 T | A | INTERGENIC | One |      |   |         |         |          |                                                                                               |    |    |    |      | 100 |
| CP000568 | 2380313 | 2380313 C | T | NON        | One | 2737 | D | Che0056 | 75384   | 89296+   | Ig-like, group 2                                                                              | 14 | 10 | 24 | 24   | 100 |
| CP000568 | 2398565 | 2398565 G | A | NON        | One | 59   | A | Che0059 | 90979   | 92430+   | type 3a cellulose-binding                                                                     | 15 | 10 | 25 | 25   | 100 |
| CP000568 | 83602   | 83602 G   | A | NON        | Del | 31   | P | Che0175 | 211898  | 213034+  | polysaccharide deacetylase                                                                    | 17 | 8  | 25 | 25   | 100 |
| CP000568 | 89026   | 89026 G   | A | SYN        | One | 151  | S | Che0392 | 487789  | 488838+  | inner-membrane translocator                                                                   | 14 | 11 | 25 | 25   | 100 |
| CP000568 | 1157787 | 1157787 T | T | NON        | One | 682  | E | Che0968 | 1157710 | 1159830- | UvrD/REP helicase                                                                             | 13 | 12 | 25 | 25   | 100 |
| CP000568 | 1455798 | 1455798 C | T | NON        | One | 2809 | A | Che1221 | 1455455 | 1464223+ | glycosyltransferase 36                                                                        | 11 | 14 | 25 | 25   | 100 |
| CP000568 | 1612520 | 1612520 T | C | SYN        | One | 244  | P | Che1328 | 1611804 | 1613081- | Stage II sporulation P                                                                        | 14 | 11 | 25 | 25   | 100 |
| CP000568 | 1894413 | 1894413 T | C | NON        | One | 49   | S | Che1566 | 1894269 | 1895612+ | Nitrogenase                                                                                   | 12 | 13 | 25 | 25   | 100 |
| CP000568 | 2087622 | 2087622 T | C | NON        | One | 215  | L | Che1765 | 2087115 | 2088266- | hypothetical protein                                                                          | 11 | 14 | 25 | 25   | 100 |
| CP000568 | 2421931 | 2421931 T | C | SYN        | One | 668  | P | Che2038 | 2421511 | 2423934+ | cellulosome enzyme, dockerin type I                                                           | 10 | 15 | 25 | 25   | 100 |
| CP000568 | 2449572 | 2449572 G | A | SYN        | One | 53   | N | Che2058 | 2449203 | 2449730- | Appr-1-p processing                                                                           | 13 | 12 | 25 | 25   | 100 |
| CP000568 | 2659299 | 2659299 T | A | NON        | Del | 27   | Q | Che2054 | 2661795 | 2662178+ | hypothetical protein                                                                          | 11 | 14 | 25 | 25   | 100 |
| CP000568 | 2766062 | 2766062 G | - | NON        | Del | 195  | N | Che2319 | 2765686 | 2766645+ | restriction endonuclease (HaeIII)                                                             | 16 | 9  | 25 | 25   | 100 |
| CP000568 | 2837314 | 2837314 A | G | NON        | One | 34   | R | Che2374 | 2837214 | 2838323+ | DNA replication and repair protein RecF                                                       | 13 | 12 | 25 | 25   | 100 |
| CP000568 | 2995953 | 2995953 G | A | NON        | One | 236  | S | Che2527 | 2995247 | 2996125+ | porphobilinogen deaminase                                                                     | 9  | 16 | 25 | 25   | 100 |
| CP000568 | 3304557 | 3304557 T | T | SYN        | One | 118  | F | Che2803 | 3304204 | 3304983+ | binding-protein-dependent transport systems                                                   | 14 | 11 | 25 | 25   | 100 |
| CP000568 | 3470913 | 3470913 A | C | NON        | Del | 65   | Q | Che2951 | 3470720 | 3471445+ | hypothetical protein                                                                          | 16 | 9  | 25 | 25   | 100 |
| CP000568 | 1212630 | 1212630 T | T | INTERGENIC | One |      |   |         |         |          |                                                                                               |    |    |    |      | 100 |
| CP000568 | 2160407 | 2160407 C | T | NON        | One | 768  | D | Che1825 | 2159911 | 2162709- | multi-sensor hybrid histidine kinase                                                          | 16 | 10 | 26 | 26   | 100 |
| CP000568 | 2216332 | 2216332 C | T | NON        | One | 599  | P | Che1868 | 2214537 | 2217740+ | carbamoyl-phosphate synthase, large subunit                                                   | 18 | 8  | 26 | 26   | 100 |
| CP000568 | 2486234 | 2486234 G | A | INTERGENIC | One |      |   |         |         |          |                                                                                               |    |    |    |      | 100 |
| CP000568 | 2843031 | 2843031 C | T | NON        | One | 165  | P | Che2378 | 2842538 | 2843407+ | parB-like partition proteins                                                                  | 14 | 12 | 26 | 26   | 100 |
| CP000568 | 2884831 | 2884831 A | G | NON        | One | 201  | D | Che2415 | 2884231 | 2884932+ | cell wall hydrolase, SlaB                                                                     | 12 | 14 | 26 | 26   | 100 |
| CP000568 | 2888660 | 2888660 C | T | NON        | One | 20   | A | Che2418 | 2887674 | 2888717- | ATPase                                                                                        | 15 | 11 | 26 | 26   | 100 |
| CP000568 | 2900823 | 2900823 G | A | STOP       | One | 243  | W | Che2427 | 2900096 | 2901052+ | protein of unknown function DUF1385                                                           | 15 | 11 | 26 | 26   | 100 |
| CP000568 | 3029980 | 3029980 A | G | NON        | One | 49   | D | Che2559 | 3029745 | 3031118+ | DagT/DnrJ/EryC1/StrS aminotransferase                                                         | 11 | 15 | 26 | 26   | 100 |
| CP000568 | 3082999 | 3082999 T | G | SYN        | One | 289  | L | Che2612 | 3082512 | 3090041+ | Fibrinectin, type III                                                                         | 14 | 12 | 26 | 26   | 100 |
| CP000568 | 3223060 | 3223060 C | T | NON        | One | 177  | A | Che2730 | 3222531 | 3223733+ | translation elongation factor Tu                                                              | 13 | 13 | 26 | 26   | 100 |
| CP000568 | 3400528 | 3400528 A | G | NON        | One | 502  | R | Che2876 | 3399024 | 3401249+ | ATP-dependent DNA helicase PcrA                                                               | 12 | 14 | 26 | 26   | 100 |
| CP000568 | 3420674 | 3420674 A | G | NON        | One | 911  | V | Che2894 | 3420404 | 3420934+ | conserved hypothetical protein                                                                | 10 | 16 | 26 | 26   | 100 |
| CP000568 | 3707682 | 3707682 A | G | INTERGENIC | One |      |   |         |         |          |                                                                                               |    |    |    |      | 100 |
| CP000568 | 1390700 | 1390700 C | T | NON        | Del | 100  | T | Che1165 | 1389543 | 1390754- | YbbR-like                                                                                     | 16 | 10 | 26 | 26   | 100 |
| CP000568 | 1715927 | 1715927 A | T | INTERGENIC | One | 19   | A |         |         |          |                                                                                               |    |    |    |      | 100 |
| CP000568 | 1828037 | 1828037 T | C | NON        | One | 253  | M | Che1504 | 1827280 | 1828092+ | Linocin_M18 bacteriocin                                                                       | 12 | 15 | 27 | 27   | 100 |
| CP000568 | 2903728 | 2903728 G | - | NON        | Del | 27   | M | Che2430 | 2903648 | 2904967+ | electron transport complex, RnfABCDGE type, C                                                 | 14 | 13 | 27 | 27   | 100 |
| CP000568 | 1506895 | 1506895-  | T | SYN        | Ins | 26   | K | Che1243 | 1506510 | 1506971- | GCN5-related N-acetyltransferase                                                              | 15 | 13 | 28 | 28   | 100 |
| CP000568 | 3086217 | 3086217 A | G | NON        | Del | 137  | T | Che2611 | 3082209 | 3087095+ | Fibrinectin, type III                                                                         | 16 | 12 | 28 | 28   | 100 |
| CP000568 | 893075  | 893075 C  | A | STOP       | One | 245  | G | Che0735 | 893001  | 893907+  | cellulosome anchoring protein, cohesin region                                                 | 19 | 10 | 29 | 29   | 100 |
| CP000568 | 15883   | 15883 T   | A | NON        | One | 1110 | A | Che0009 | 12555   | 18077+   | YD repeat containing protein                                                                  | 17 | 13 | 30 | 30   | 100 |
| CP000568 | 182829  | 182829 G  | C | NON        | One | 175  | A | Che0143 | 182307  | 183608+  | Phosphorylase                                                                                 | 19 | 12 | 31 | 31   | 100 |
| CP000568 | 2432297 | 2432297 T | C | INTERGENIC | One |      |   |         |         |          |                                                                                               |    |    |    |      | 100 |
| CP000568 | 3232523 | 3232523 G | A | SYN        | One | 110  | Y | Che2815 | 3234051 | 3236652- | lysyl-tRNA synthetase                                                                         | 16 | 15 | 31 | 31   | 100 |
| CP000568 | 2975548 | 2975548 A | A | NON        | One | 834  | M | Che2506 | 2973047 | 2976098+ | S-layer-like domain containing protein                                                        | 13 | 19 | 32 | 32   | 100 |
| CP000568 | 3031364 | 3031364 T | C | NON        | One | 38   | A | Che2560 | 3031251 | 3031799+ | dUDP-4-dehydrothiamine 3,5-epimerase                                                          | 13 | 19 | 32 | 32   | 100 |
| CP000568 | 2225182 | 2225182 C | T | NON        | One | 69   | T | Che1873 | 2224043 | 2225386- | HMG-I and HMG-Y, DNA-binding                                                                  | 18 | 16 | 34 | 34   | 100 |
| CP000568 | 2351019 | 2351019 C | T | SYN        | One | 83   | E | Che1968 | 2348067 | 2351267- | cell division/ftsK/SpoIIIE                                                                    | 16 | 18 | 34 | 34   | 100 |
| CP000568 | 3693510 | 3693510 C | T | INTERGENIC | One |      |   |         |         |          |                                                                                               |    |    |    |      | 100 |
| CP000568 | 2947995 | 2947995 A | G | NON        | One | 361  | S | Che2475 | 2946915 | 2948348+ | phage portal protein, SPP1 family                                                             | 18 | 26 | 44 | 44   | 100 |
| CP000568 | 2943643 | 2943643 G | A | NON        | One | 333  | G | Che2471 | 2942646 | 2943926+ | conserved hypothetical protein                                                                | 20 | 31 | 51 | 51   | 100 |
| CP000568 | 2900141 | 2900141-  | G | SYN        | Ins | 16   | G | Che2427 | 2900096 | 2901052+ | protein of unknown function DUF1385                                                           | 16 | 15 | 31 | 31   | 97  |
| CP000568 | 3240362 | 3240362 G | A | NON        | One | 42   | Q | Che2746 | 3240238 | 3240708+ | protein of unknown function DUF407                                                            | 10 | 11 | 22 | 23   | 96  |
| CP000568 | 3742942 | 3742942 C | T | SYN        | One | 37   | V | Che3167 | 3742832 | 3743953+ | glucose-1-phosphate adenylyltransferase, GlgD                                                 | 11 | 12 | 22 | 23   | 96  |
| CP000568 | 1561620 | 1561620 T | T | NON        | Del | 393  | H | Che2085 | 1561401 | 1562786- | metal dependent phosphohydrolase                                                              | 15 | 10 | 23 | 24   | 96  |
| CP000568 | 2461889 | 2461889-  | G | SYN        | Ins | 68   | R | Che2069 | 2461687 | 2462463+ | hypothetical protein                                                                          | 14 | 9  | 23 | 24   | 96  |
| CP000568 | 536206  | 536206-   | A | SYN        | Ins | 393  | E | Che0426 | 536029  | 536699+  | putative PAS/PAC sensor protein                                                               | 14 | 10 | 24 | 25   | 96  |
| CP000568 | 2116605 | 2116605 T | - | NON        | Del | 1231 | - | Che1793 | 2116267 | 2116971+ | protein of unknown function DUF1624                                                           | 10 | 10 | 24 | 25   | 96  |
| CP000568 | 2434214 | 2434214-  | T | SYN        | Ins | 23   | K | Che2044 | 2433860 | 2434282- | hypothetical protein                                                                          | 8  | 16 | 24 | 25   | 96  |
| CP000568 | 187474  | 187474 A  | G | NON        | Del | 187  | K | Che0047 | 187366  | 187797+  | protein of unknown function DUF523                                                            | 10 | 15 | 25 | 25   | 96  |
| CP000568 | 8811    | 8811 G    | A | SYN        | One | 1648 | R | Che0004 | 3874    | 9702+    | YD repeat containing protein                                                                  | 12 | 14 | 26 | 27   | 96  |
| CP000568 | 2476065 | 2476065-  | A | SYN        | Ins | 320  | K | Che2083 | 2475825 | 2477024+ | DNA-directed DNA polymerase                                                                   | 15 | 11 | 26 | 27</ |     |

|          |         |                                                      |                      |            |     |        |         |         |          |                                     |                                                  |    |    |    |    |    |
|----------|---------|------------------------------------------------------|----------------------|------------|-----|--------|---------|---------|----------|-------------------------------------|--------------------------------------------------|----|----|----|----|----|
| CP000568 | 1273130 | 1273130                                              | T                    | INTERGENIC | Ins |        |         |         |          |                                     |                                                  | 4  | 7  | 11 | 12 | 92 |
| CP000568 | 1495972 | 1495972                                              | T                    | SYN        | Ins | 1021 K | Che1235 | 1478377 | 1490034- | Cellulose 1,4-beta-cellulobiosidase |                                                  | 7  | 4  | 11 | 12 | 92 |
| CP000568 | 1946531 | 1946531 T                                            | C                    | NON        | One | 531 T  | A       | Che1616 | 1945599  | phage minor structural protein      |                                                  | 3  | 8  | 11 | 12 | 92 |
| CP000568 | 780355  | 780355 C                                             | T                    | SYN        | One | 20 P   | P       | Che0633 | 780296   | 780781+                             |                                                  | 6  | 6  | 12 | 13 | 92 |
| CP000568 | 870718  | 870718 T                                             | C                    | NON        | One | 560 Y  | H       | Che0714 | 869041   | 871125+                             | hydroxymethylbutenyl pyrophosphate reductase     | 6  | 6  | 12 | 13 | 92 |
| CP000568 | 913540  | 913540 C                                             | T                    | NON        | One | 155 R  | C       | Che1584 | 1913323  | 1914302-                            | two component transcriptional regulator, AraC    | 8  | 4  | 12 | 13 | 92 |
| CP000568 | 2720003 | 2720003 T                                            | -                    | NON        | Del | 21 N   | -       | Che2272 | 2701941  | 2702855+                            | conserved hypothetical protein                   | 16 | 6  | 22 | 24 | 92 |
| CP000568 | 2782553 | 2782553 G                                            | A                    | NON        | One | 264 L  | F       | Che2334 | 2781498  | 2783342-                            | polysaccharide biosynthesis protein CapD         | 13 | 9  | 22 | 24 | 92 |
| CP000568 | 321569  | 321569 G                                             | A                    | NON        | One | 671 E  | K       | Che0260 | 319559   | 321682+                             | peptidase S1 and S6, chymotrypsin/Hap            | 15 | 9  | 24 | 26 | 92 |
| CP000568 | 1205955 | 1205955 G                                            | A                    | NON        | One | 187 E  | K       | Che1008 | 1205397  | 1206518+                            | aminodeoxychorismate lyase                       | 12 | 8  | 20 | 22 | 91 |
| CP000568 | 196295  | 196295 A                                             | A                    | SYN        | Ins | 335 K  | K       | Che0156 | 195093   | 196934+                             | Radical SAM                                      | 8  | 13 | 23 | 21 | 89 |
| CP000568 | 1627581 | 1627581 G                                            | A                    | INTERGENIC | Ins |        |         |         |          |                                     |                                                  | 13 | 8  | 21 | 23 | 91 |
| CP000568 | 2017515 | 2017515 C                                            | C                    | INTERGENIC | Ins |        |         |         |          |                                     |                                                  | 13 | 8  | 21 | 23 | 91 |
| CP000568 | 3665258 | 3665258 G                                            | A                    | INTERGENIC | One |        |         |         |          |                                     |                                                  | 12 | 9  | 21 | 23 | 91 |
| CP000568 | 2706499 | 2706499 A                                            | T                    | INTERGENIC | Ins |        |         |         |          |                                     |                                                  | 12 | 18 | 30 | 33 | 91 |
| CP000568 | 2800249 | 2800249 A                                            | A                    | SYN        | Ins | 52 K   | K       | Che2427 | 2300096  | 2901802+                            | protein of unknown function DUF1385              | 16 | 14 | 30 | 33 | 91 |
| CP000568 | 1403386 | 1403386 G                                            | G                    | NON        | One | 170 T  | A       | Che1175 | 1402529  | 1403338+                            | hypothetical protein                             | 3  | 9  | 10 | 10 | 89 |
| CP000568 | 533461  | 533461 C                                             | T                    | NON        | One | 704 P  | L       | Che0423 | 531351   | 533972+                             | iron-containing alcohol dehydrogenase            | 4  | 6  | 8  | 9  | 89 |
| CP000568 | 3379326 | 3379326 T                                            | C                    | SYN        | One | 379 S  | S       | Che2860 | 3378190  | 3379900+                            | hypothetical protein precursor                   | 4  | 4  | 8  | 9  | 89 |
| CP000568 | 244074  | 244074 -                                             | A                    | SYN        | Ins | 15 Q   | Q       | Che0201 | 244031   | 244753+                             | glutamate synthase, alpha subunit-like           | 7  | 10 | 17 | 19 | 89 |
| CP000568 | 1194190 | 1194190 C                                            | T                    | NON        | One | 9 R    | K       | Che0996 | 1189887  | 1194215-                            | DNA polymerase III, alpha subunit                | 9  | 6  | 17 | 19 | 89 |
| CP000568 | 3749144 | 3749144 G                                            | A                    | SYN        | One | 777 V  | V       | Che3171 | 3746814  | 3749261+                            | S-layer domain-like                              | 5  | 12 | 17 | 19 | 89 |
| CP000568 | 97575   | 97575 C                                              | C                    | INTERGENIC | One |        |         |         |          |                                     |                                                  | 8  | 7  | 15 | 17 | 88 |
| CP000568 | 1330160 | 1330160 C                                            | T                    | NON        | Mul | 254 G  | R       | Che1115 | 1329264  | 1330919-                            | Tn7-like transposition protein C                 | 4  | 11 | 15 | 17 | 88 |
| CP000568 | 3159478 | 3159478 -                                            | T                    | SYN        | Ins | 57 K   | K       | Che2678 | 3159114  | 3159647-                            | hypothetical protein                             | 8  | 7  | 15 | 17 | 88 |
| CP000568 | 1248961 | 1248961 -                                            | T                    | SYN        | Ins | 431 K  | K       | Che1046 | 1248913  | 1250253+                            | extracellular solute-binding protein, family 1   | 9  | 4  | 3  | 22 | 88 |
| CP000568 | 8636341 | 8636341 -                                            | T                    | NON        | One | 187 C  | C       | Che2207 | 8635725  | 8636900-                            | acyltransferase                                  | 10 | 13 | 23 | 26 | 88 |
| CP000568 | 2791484 | 2791484 -                                            | A                    | SYN        | Ins | 285 F  | F       | Che2341 | 2791172  | 2792338-                            | glycosyl transferase, family 2                   | 13 | 10 | 23 | 26 | 88 |
| CP000568 | 1103031 | 1103031 -                                            | T                    | SYN        | Ins | 741 K  | K       | Che0918 | 1101624  | 1105253-                            | cellulosome enzyme, dockerin type I              | 4  | 3  | 7  | 8  | 87 |
| CP000568 | 949261  | 949261 C                                             | T                    | NON        | One | 42 H   | Y       | Che0785 | 949138   | 949440+                             | hypothetical protein                             | 6  | 7  | 14 | 16 | 87 |
| CP000568 | 3432750 | 3432750 A                                            | A                    | INTERGENIC | Del |        |         |         |          |                                     |                                                  | 7  | 6  | 20 | 23 | 87 |
| CP000568 | 863219  | 863219 A                                             | A                    | SYN        | Ins | 66 K   | K       | Che0705 | 863024   | 863260+                             | hypothetical protein                             | 10 | 11 | 18 | 21 | 87 |
| CP000568 | 272547  | 272547 -                                             | T                    | SYN        | Ins | 63 F   | F       | Che2291 | 2725445  | 272735-                             | hypothetical protein                             | 8  | 13 | 21 | 24 | 87 |
| CP000568 | 2320021 | 2320021 G                                            | A                    | NON        | One | 43 S   | F       | Che1944 | 2319600  | 2320148-                            | protein of unknown function DUF458               | 12 | 14 | 26 | 30 | 87 |
| CP000568 | 2382985 | 2382985 -                                            | T                    | INTERGENIC | Ins |        |         |         |          |                                     |                                                  | 14 | 14 | 28 | 32 | 87 |
| CP000568 | 3379300 | 3379300 T                                            | G                    | NON        | One | 371 C  | G       | Che2860 | 3378190  | 3379900+                            | hypothetical protein precursor                   | 3  | 3  | 6  | 7  | 86 |
| CP000568 | 234760  | 234760 -                                             | A                    | SYN        | Ins | 107 E  | E       | Che1885 | 223844   | 2239013+                            | phage integrase-like SAM-like                    | 7  | 11 | 18 | 21 | 86 |
| CP000568 | 2873484 | 2873484 -                                            | A                    | NON        | One | 245 K  | K       | Che2407 | 2872750  | 2874374+                            | AAA ATPase, central region                       | 7  | 11 | 18 | 21 | 86 |
| CP000568 | 2872117 | 2872117 -                                            | A                    | INTERGENIC | Ins |        |         |         |          |                                     |                                                  | 14 | 5  | 19 | 22 | 86 |
| CP000568 | 138885  | 138885 C                                             | T                    | SYN        | One | 328 P  | P       | Che0106 | 137902   | 139143+                             | GTP cyclohydrolase II                            | 8  | 16 | 24 | 28 | 86 |
| CP000568 | 269914  | 269914 -                                             | T                    | INTERGENIC | Ins |        |         |         |          |                                     |                                                  | 6  | 11 | 17 | 20 | 85 |
| CP000568 | 1020112 | 1020112 T                                            | T                    | SYN        | Ins | 3 N    | N       | Che0841 | 1018890  | 1020119-                            | mutants block sporulation after engulfment       | 11 | 6  | 17 | 20 | 85 |
| CP000568 | 2892757 | 2892757 -                                            | T                    | SYN        | Ins | 278 K  | K       | Che2422 | 2892517  | 2893590-                            | hypothetical protein                             | 5  | 11 | 16 | 19 | 84 |
| CP000568 | 530864  | 530864 G                                             | A                    | NON        | One | 60 G   | S       | Che0422 | 530687   | 531370+                             | CoA-binding                                      | 5  | 5  | 10 | 12 | 83 |
| CP000568 | 3758418 | 3758418 -                                            | A                    | INTERGENIC | Ins |        |         |         |          |                                     |                                                  | 7  | 11 | 18 | 22 | 82 |
| CP000568 | 82364   | 82364 -                                              | A                    | SYN        | Ins | 2324 E | E       | Che0056 | 75394    | 89286+                              | Ig-like, group 2                                 | 7  | 6  | 13 | 16 | 81 |
| CP000568 | 3607977 | 3607977 G                                            | A                    | NON        | One | 590 K  | K       | Che0989 | 3506208  | 3508162+                            | glycosyltransferase 36                           | 5  | 12 | 17 | 21 | 81 |
| CP000568 | 2509967 | 2509967 G                                            | A                    | INTERGENIC | One |        |         |         |          |                                     |                                                  | 9  | 23 | 22 | 27 | 81 |
| CP000568 | 2152897 | 2152897 -                                            | T                    | SYN        | Ins | 10 N   | N       | Che1817 | 2152557  | 2152925-                            | urease, beta subunit                             | 7  | 7  | 14 | 18 | 78 |
| CP000568 | 3613913 | 3613913 -                                            | A                    | SYN        | Ins | 2 K    | K       | Che3073 | 3613910  | 3614581+                            | HAD-superfamily hydrolase, subfamily IA, variant | 11 | 3  | 14 | 18 | 78 |
| CP000568 | 3630169 | 3630172 ATCT                                         | GTCA                 | NON        | One | 1647 P | -       | Che3078 | 3625229  | 3632170+                            | cellulosome anchoring protein, cohesion region   | 2  | 1  | 3  | 4  | 75 |
| CP000568 | 245709  | 245711 TCC                                           | CTCT                 | NON        | One | 355 A  | -       | Che2691 | 2456901  | 2458295-                            | cellulosome anchoring protein, cohesion region   | 2  | 4  | 6  | 8  | 75 |
| CP000568 | 2263439 | 2263439 T                                            | -                    | NON        | Del | 86 K   | -       | Che1005 | 2262465  | 2263695+                            | glycosyl transferase, family 28                  | 6  | 6  | 12 | 16 | 75 |
| CP000568 | 1329105 | 1329118 TTGAAGGCAAGTCC                               | -                    | NON        | Del | 52 N   | -       | Che1114 | 1327372  | 1329258-                            | Tn7-like transposition protein D                 | 3  | 5  | 8  | 11 | 73 |
| CP000568 | 2245662 | 2245662 T                                            | C                    | SYN        | One | 410 L  | L       | Che1890 | 2244759  | 2246891-                            | cellulosome enzyme, dockerin type I              | 4  | 1  | 5  | 7  | 71 |
| CP000568 | 2245669 | 2245671 TCT                                          | CCG                  | NON        | One | 408 E  | -       | Che1890 | 2244759  | 2246891-                            | cellulosome enzyme, dockerin type I              | 4  | 1  | 5  | 7  | 71 |
| CP000568 | 1132396 | 1132396 C                                            | T                    | SYN        | Ins | 49 G   | G       | Che0945 | 1132140  | 1133132-                            | metallophosphoesterase                           | 5  | 7  | 15 | 17 | 71 |
| CP000568 | 3065054 | 3065055 GA                                           | TT                   | INTERGENIC | Mul |        |         |         |          |                                     |                                                  | 9  | 7  | 16 | 30 | 53 |
| CP000568 | 3065049 | 3065051 GGT                                          | TGC                  | NON        | One | 155 W  | -       | Che2592 | 3064586  | 3065053+                            | hypothetical protein                             | 9  | 7  | 16 | 31 | 52 |
| CP000568 | 542230  | 542230 T                                             | C                    | INTERGENIC | One |        |         |         |          |                                     |                                                  | 2  | 4  | 6  | 12 | 50 |
| CP000568 | 1476864 | 1476864 A                                            | G                    | INTERGENIC | One |        |         |         |          |                                     |                                                  | 6  | 3  | 9  | 18 | 50 |
| CP000568 | 3643837 | 3643837 C                                            | T                    | NON        | One | 69 A   | T       | Che3089 | 3643649  | 3644041+                            | UspA                                             | 4  | 9  | 13 | 26 | 50 |
| CP000568 | 2125777 | 2125777 C                                            | T                    | NON        | One | 490 A  | V       | Che1798 | 2124309  | 2126225+                            | ABC transporter related                          | 4  | 7  | 11 | 23 | 48 |
| CP000568 | 290766  | 290766 -                                             | TATA                 | INTERGENIC | Ins |        |         |         |          |                                     |                                                  | 2  | 3  | 5  | 11 | 45 |
| CP000568 | 1083495 | 1083495 T                                            | C                    | NON        | Mul | 295 E  | G       | Che0906 | 1083026  | 1084378-                            | Radical SAM                                      | 3  | 3  | 6  | 14 | 43 |
| CP000568 | 2495816 | 2495818 CGA                                          | -                    | NON        | Del | 158 G  | -       | Che2099 | 2495655  | 2496287-                            | nucleoside recognition                           | 1  | 4  | 5  | 12 | 42 |
| CP000568 | 2125349 | 2125349 C                                            | -                    | SYN        | Ins | 347 R  | R       | Che1779 | 2125399  | 2126225-                            | ABC transporter related                          | 5  | 4  | 8  | 19 | 42 |
| CP000568 | 2874591 | 2874591 A                                            | -                    | NON        | One | 41 A   | A       | Che2088 | 2874469  | 2875197+                            | phage shock protein A, PspA                      | 5  | 4  | 9  | 22 | 41 |
| CP000568 | 1903064 | 1903064 C                                            | T                    | NON        | One | 719 E  | K       | Che0912 | 1908285  | 1902518-                            | glycoside hydrolase, family 10                   | 4  | 2  | 6  | 15 | 40 |
| CP000568 | 3342638 | 3342638 G                                            | A                    | NON        | Mul | 565 E  | K       | Che2825 | 3340946  | 3342793+                            | conserved hypothetical protein precursor         | 8  | 7  | 15 | 39 | 38 |
| CP000568 | 1851137 | 1851137 A                                            | T                    | NON        | One | 306 Y  | H       | Che1525 | 1850184  | 1852052-                            | protein of unknown function DUF214               | 4  | 5  | 9  | 24 | 37 |
| CP000568 | 3342659 | 3342659 A                                            | G                    | SYN        | Del | 48 B   | Q       | Che2826 | 3340946  | 3342793+                            | conserved hypothetical protein precursor         | 8  | 7  | 15 | 30 | 37 |
| CP000568 | 3342625 | 3342627 TGA                                          | -                    | NON        | Del | 560 N  | -       | Che2825 | 3340946  | 3342793+                            | conserved hypothetical protein precursor         | 8  | 7  | 15 | 41 | 37 |
| CP000568 | 1855366 | 1855366 A                                            | G                    | NON        | One | 209 S  | P       | Che1529 | 1854740  | 1855992-                            | transposase                                      | 1  | 3  | 4  | 11 | 36 |
| CP000568 | 509539  | 509539 -                                             | T                    | SYN        | Ins | 6 K    | K       | Che0407 | 508249   | 509556-                             | Radical SAM                                      | 1  | 5  | 6  | 17 | 35 |
| CP000568 | 3342604 | 3342621 GATAGGGTATAAACAGG                            | AAAGGGTGTAGATCAGGGGA | NON        | One | 553 L  | -       | Che2825 | 3340946  | 3342793+                            | conserved hypothetical protein precursor         | 7  | 6  | 13 | 37 | 35 |
| CP000568 | 3342592 | 3342592 A                                            | A                    | SYN        | One | 549 S  | S       | Che2825 | 3340946  | 3342793+                            | conserved hypothetical protein precursor         | 8  | 5  | 13 | 38 | 34 |
| CP000568 | 2271533 | 2271535 GCC                                          | -                    | NON        | One | 113 A  | T       | Che1990 | 2371523  | 2371870+                            | hypothetical protein                             | 2  | 2  | 4  | 3  | 9  |
| CP000568 | 790216  | 790216 G                                             | A                    | SYN        | One | 233 S  | S       | Che0639 | 789712   | 7900154-                            | glycoside hydrolase, family 13-like              | 1  | 3  | 4  | 12 | 33 |
| CP000568 | 3327878 | 3327881 ATTT                                         | TTAA                 | INTERGENIC | One |        |         |         |          |                                     |                                                  | 4  | 3  | 7  | 21 | 33 |
| CP000568 | 3336374 | 3336374 A                                            | C                    | NON        | One | 66 T   | A       | Che2821 | 3336179  | 3337273+                            | response regulator receiver modulated CheB       | 4  | 2  | 6  | 19 | 32 |
| CP000568 | 980941  | 980941 T                                             | C                    | INTERGENIC | One |        |         |         |          |                                     |                                                  | 4  | 5  | 9  | 28 | 32 |
| CP000568 | 619235  | 619242 CTTTTTTC                                      | TCITTTTTT            | NON        | One | 214 S  | -       | Che0507 | 619228   | 619875-                             | Exonuclease, RNase T and DNA polymerase III      | 2  | 2  | 4  | 13 | 41 |
| CP000568 | 1627485 | 1627529 TTGTGCGAATAATTATTGTGCGAATAATTATTGTGCGAATAATA | -                    | INTERGENIC | Del |        |         |         |          |                                     |                                                  | 3  | 2  | 5  | 16 | 31 |
| CP000568 | 2282632 | 2282632 G                                            | A                    | NON        | One | 113 A  | V       | Che1915 | 2281578  | 2282969-                            | periplasmic sensor signal transduction histidine | 1  | 9  | 10 | 32 | 31 |
| CP000568 | 2100481 | 2100481 C                                            | T                    | NON        | One | 173 A  | T       | Che1778 | 2100038  | 210099                              |                                                  |    |    |    |    |    |

|          |         |             |         |            |     |       |   |          |         |          |                                            |   |   |   |    |    |
|----------|---------|-------------|---------|------------|-----|-------|---|----------|---------|----------|--------------------------------------------|---|---|---|----|----|
| CP000568 | 371791  | 371791 A    | G       | NON        | One | 322 Y | C | Ctbe0296 | 370827  | 372302+  | hypothetical protein                       | 1 | 2 | 3 | 18 | 17 |
| CP000568 | 2412393 | 2412393 G   | A       | NON        | Mul | 984 P | L | Ctbe2032 | 2409329 | 2415343- | hypothetical protein                       | 1 | 2 | 3 | 18 | 17 |
| CP000568 | 445662  | 445662 C    | T       | NON        | One | 110 T | I | Ctbe0355 | 445334  | 446512+  | conserved hypothetical protein             | 1 | 3 | 4 | 24 | 17 |
| CP000568 | 2600988 | 2600988 G   | AGT     | NON        | One | 515 A | - | Ctbe2182 | 2599446 | 2602235+ | Ig-like, group 2                           | 1 | 2 | 3 | 19 | 16 |
| CP000568 | 3144485 | 3144487 TAA | GGAACCG | NON        | One | 361 L | - | Ctbe2664 | 3143384 | 3145105+ | ABC-1                                      | 1 | 2 | 3 | 19 | 16 |
| CP000568 | 614571  | 614571 C    | -       | INTERGENIC | Del |       |   |          |         |          |                                            | 1 | 2 | 3 | 21 | 14 |
| CP000568 | 2127018 | 2127020 GCA | C       | NON        | One | 201 A | P | Ctbe1800 | 2128418 | 2127929+ | Peptidoglycan-binding LysM                 | 1 | 2 | 3 | 22 | 14 |
| CP000568 | 3310989 | 3310989 T   | C       | SYN        | One | 99 R  | R | Ctbe2809 | 3310693 | 3314658+ | glycoside hydrolase, family 16             | 1 | 2 | 3 | 23 | 13 |
| CP000568 | 124029  | 124029 C    | T       | SYN        | One | 11 S  | S | Ctbe0091 | 123997  | 126126+  | Peptidoglycan glycosyltransferase          | 1 | 2 | 3 | 24 | 12 |
| CP000568 | 1958491 | 1958491 G   | A       | STOP       | One | 435 R | * | Ctbe1631 | 1958009 | 1959793- | conserved hypothetical protein             | 2 | 1 | 3 | 25 | 12 |
| CP000568 | 3007869 | 3007869 A   | G       | NON        | One | 482 N | D | Ctbe2537 | 3006426 | 3008225+ | sulfate adenylyltransferase, large subunit | 1 | 2 | 3 | 24 | 12 |
| CP000568 | 3016361 | 3016362 TG  | -       | NON        | Del | 110 F | - | Ctbe2548 | 3016032 | 3017543+ | Alpha-N-arabinofuranosidase                | 1 | 2 | 3 | 25 | 12 |
| CP000568 | 1260236 | 1260236-    | T       | SYN        | Ins | 12 Y  | Y | Ctbe1055 | 1260203 | 1261411+ | protein of unknown function DUF58          | 1 | 2 | 3 | 27 | 11 |
| CP000568 | 2397277 | 2397277 A   | G       | SYN        | One | 140 L | L | Ctbe2018 | 2396459 | 2397694- | conserved hypothetical protein             | 1 | 3 | 4 | 40 | 10 |

2397277









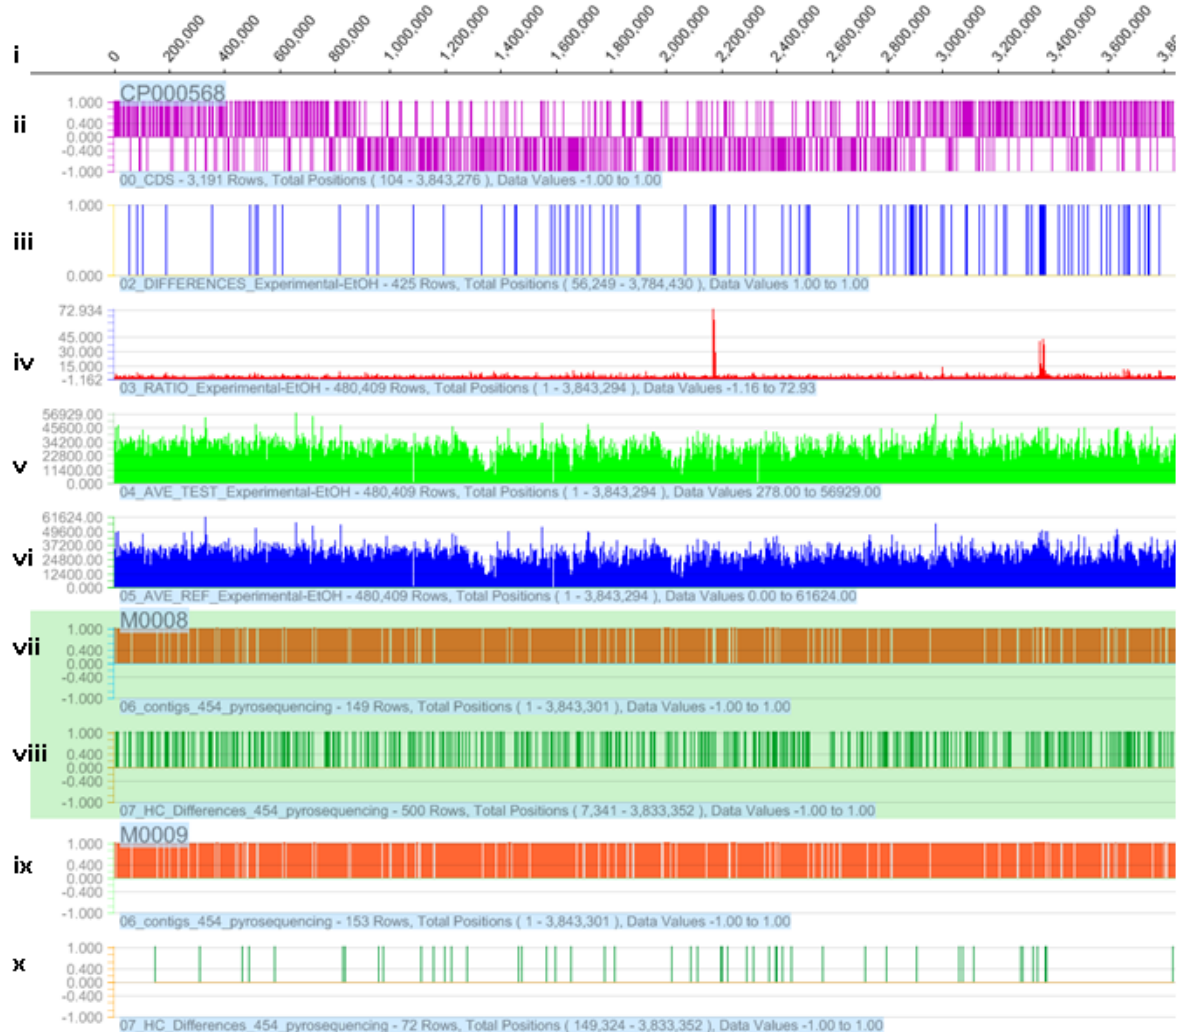

**Figure S1. Summary of pyrosequencing and comparative genome sequencing (CGS) resequencing data for *C. thermocellum* wild-type strain 27405 and the EA mutant strain.** Genome positions (i) and genes (ii) are indicated. 425 differences for mutant strain EA were identified by CGS (iii), along with two putative regions where DNA was deleted (iv). CGS microarray signal intensities are represented for the mutant (v) and wild-type (vi) strains. Contiguous regions of DNA that mapped to wild-type reference genome from pyrosequencing data for the mutant (153) and strain 27405 (149) are shown, vii and ix respectively. 500 putative high-confidence differences were determined by pyrosequencing for mutant strain EA (viii) and 72 putative high-confidence differences were identified for strain 27405 (x).

All HCDiff wild-type  
pyrosequencing  
differences

All HCDiff EA  
mutant  
pyrosequencing  
differences

Filtered wild-type  
pyrosequencing  
differences

Filtered EA mutant  
pyrosequencing  
differences

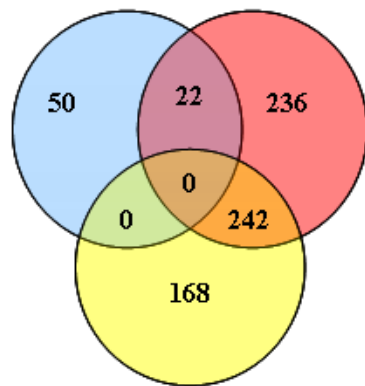

All EA mutant CGS  
differences

A

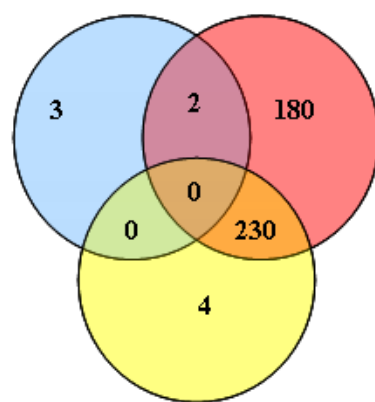

Filtered EA mutant CGS  
differences

B

**Supplemental Figure S2. Venn analysis of pyrosequencing and CGS resequencing data.** 'High confidence' genetic differences identified by pyrosequencing for wild-type and mutant EA strains and all putative CGS differences are shown (A). Pyrosequencing differences with 'variation values' less than 80% and CGS differences defined as either 'low' or 'medium' confidence were filtered out during this analysis (B). All genetic differences and descriptions are shown in Tables Supplemental S1-3.

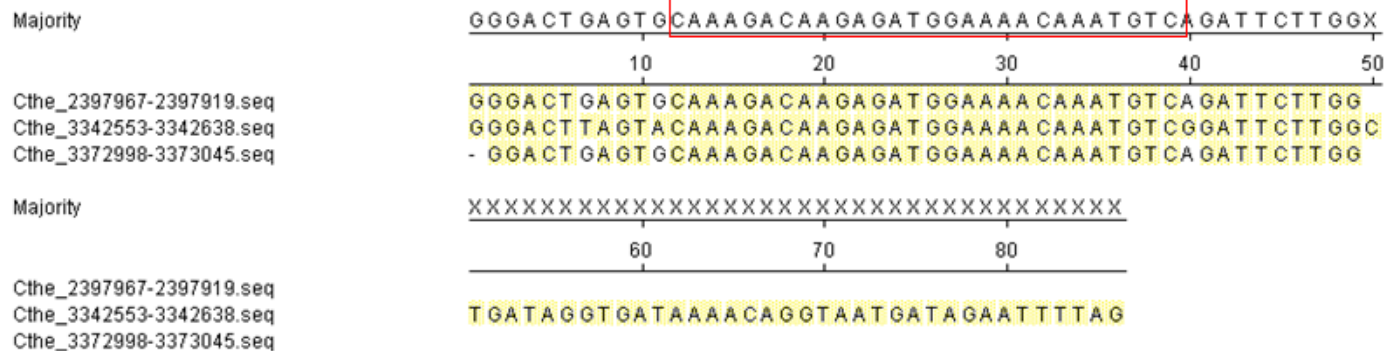

**Supplemental Figure S3. Repetitive DNA detected in “High Confidence Differences (HCDiffs)” regions with low variation values.** Twenty five putative HCDiffs were reported by the GSMapper software for conserved hypothetical genes Cthe\_2018, Cthe\_2825-Cthe\_2826, and Cthe\_2854-Cthe\_2855 for the wild-type strain and the majority were also reported in the mutant strain. A closer examination revealed low variation values for the putative differences (mean of 30) and a CLUSTALW alignment using MegAlign (DNASTar 8.0.2) revealed 28 nucleotides were repeated (red box). A previous study indicated so called HCDiffs with low variation values should be interpreted with caution and are likely false positives. (S. Yang, M. L. Land, D. M. Klingeman, D. A. Pelletier, T.-Y. S. Lu, S. L. Martin, H.-B. Guo, J. C. Smith, S. D. Brown. Paradigm for industrial strain improvement identifies sodium acetate tolerance loci in *Zymomonas mobilis* and *Saccharomyces cerevisiae*. *Proceedings of the National Academy of Sciences*, 2010; 107 (23): 10395 DOI: [10.1073/pnas.0914506107](https://doi.org/10.1073/pnas.0914506107)).

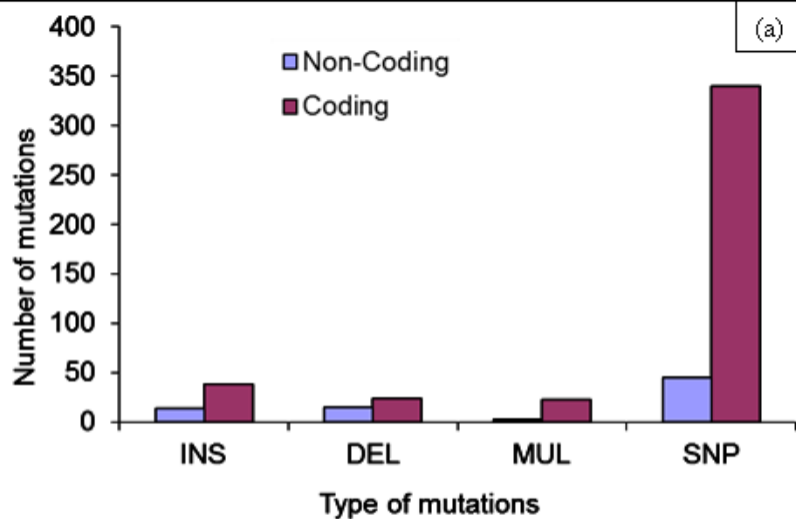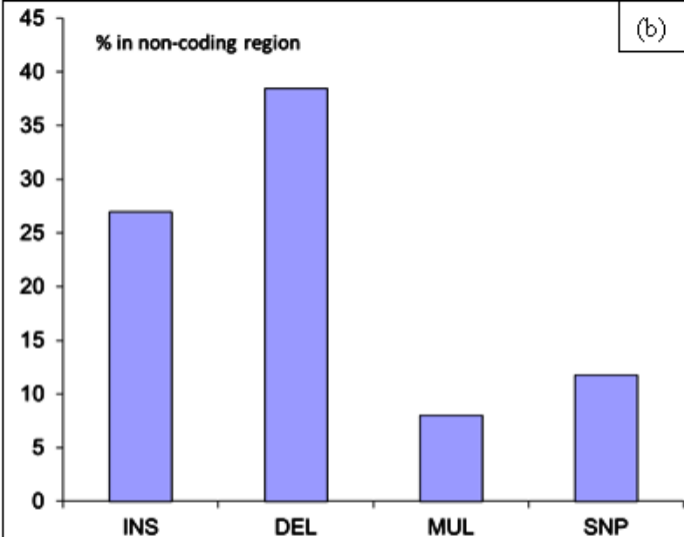

**Supplemental Figure S4. Distribution analysis of EA mutant pyrosequencing data.** 16 mutational hotspots identified in this analysis are described in detail in Table 3.

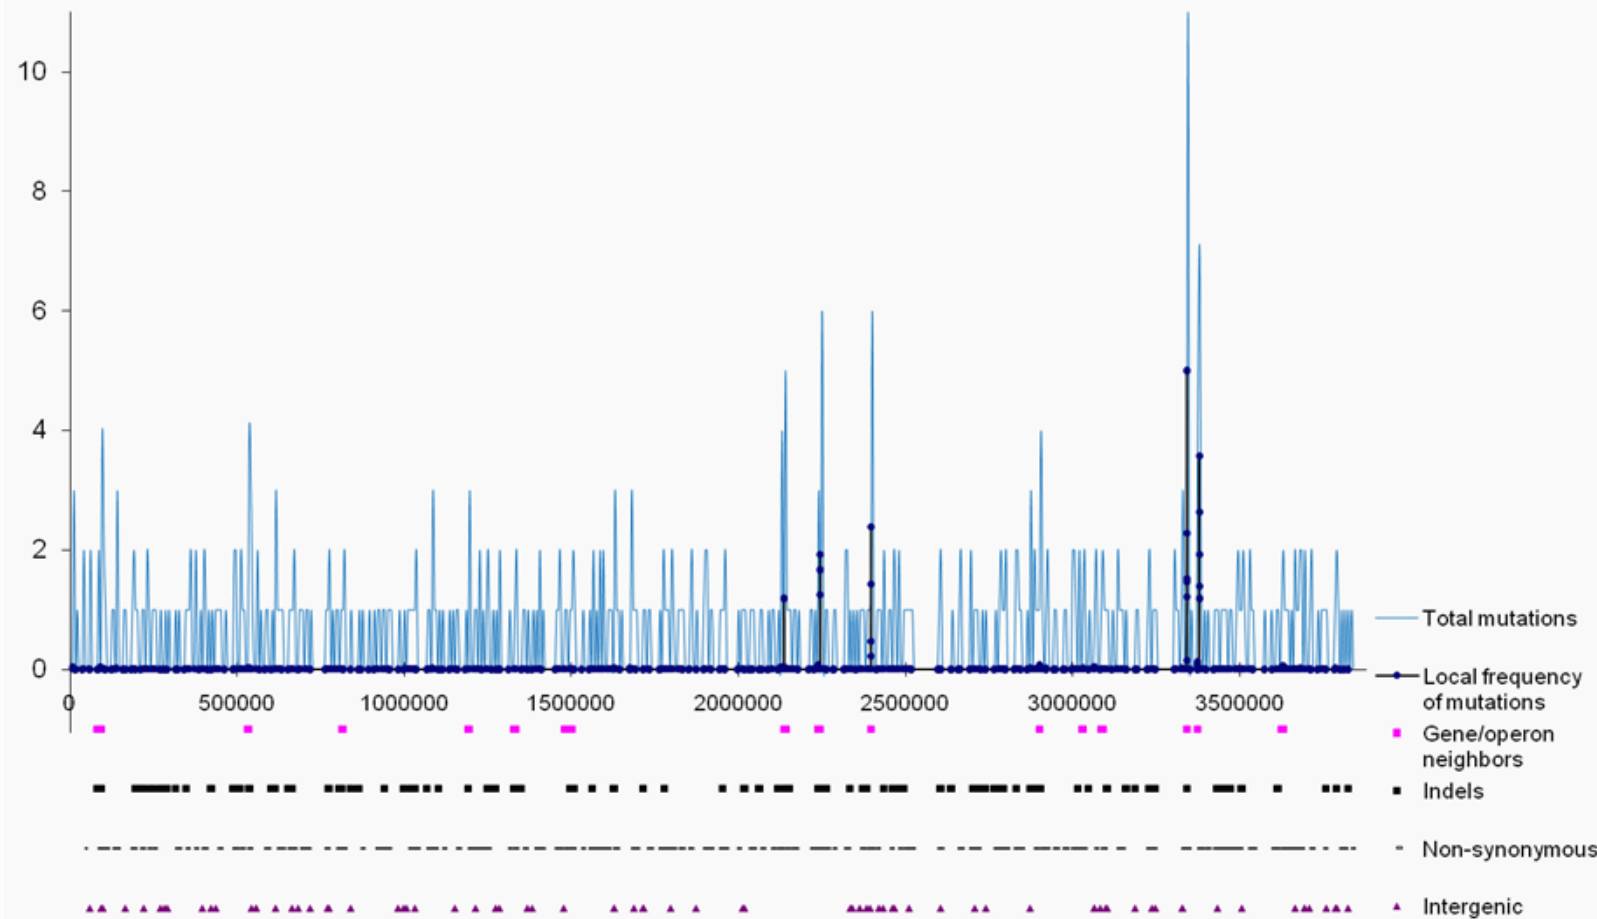

**Supplemental Figure S5. Types of genomic mutations identified in the EA mutant by pryosequencing.** Types and numbers of identified mutations in coding and non-coding regions of the EA genome (a) and percentage of different types of mutations found in non-coding regions of the genome (b).

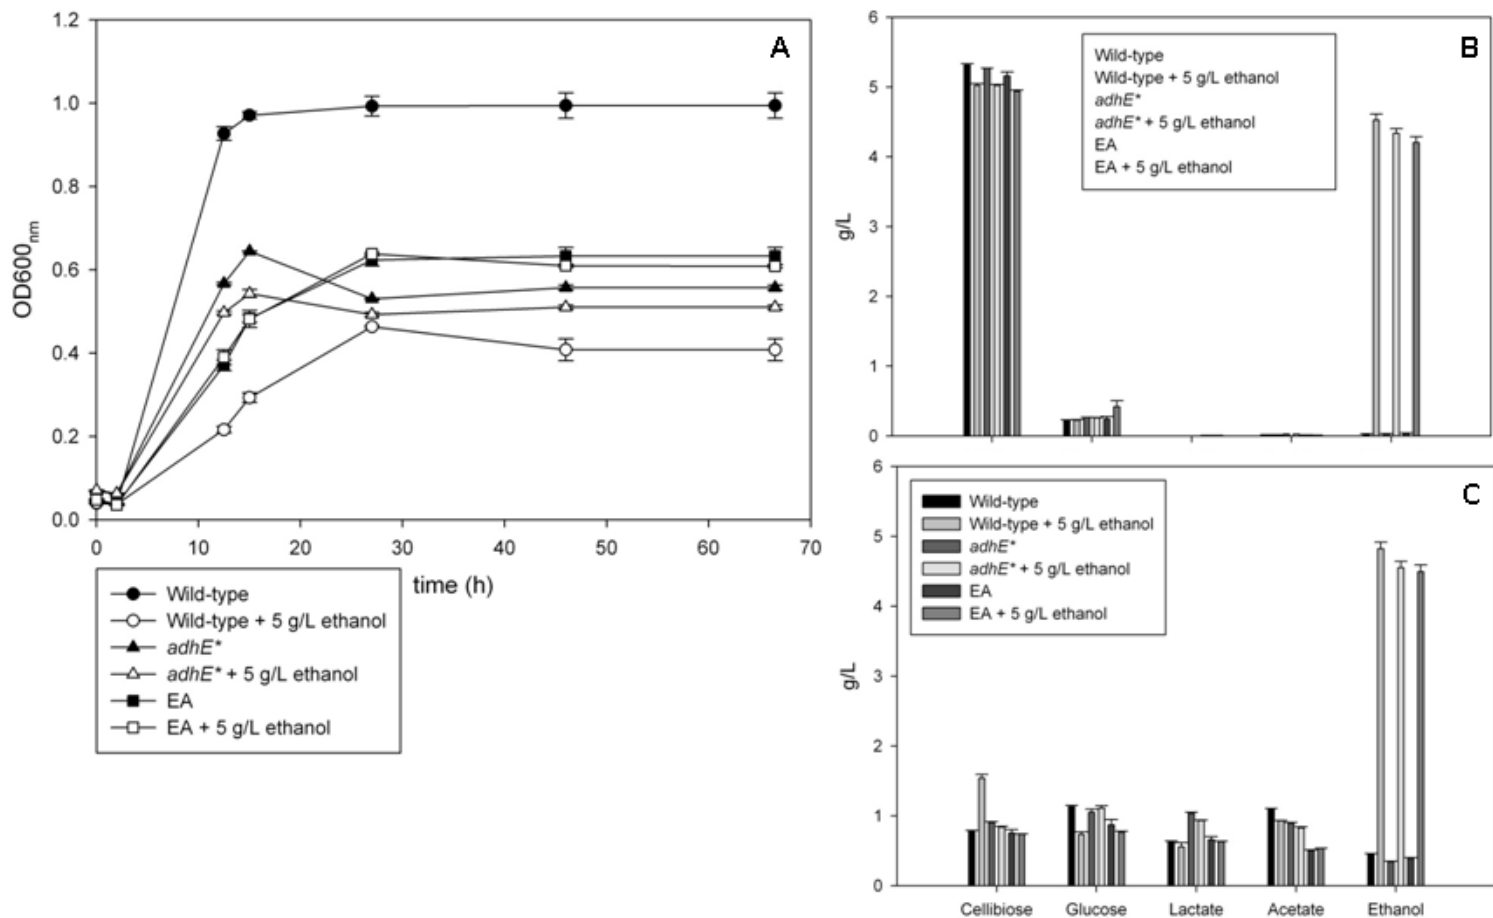

**Figure S6. Growth and extracellular metabolite analysis of *C. thermocellum* mutants *adhE\**, EA and wild-type 27405.** All cultures (including inocula) were grown in media for thermophilic clostridia (MTC) containing 5 g/L cellobiose and 2 g/L yeast extract at 55°C and 125 rpm. Anaerobic ethanol was added at a concentration of 5 g/L to select cultures. A 1 mL inoculum from a serum bottle was added to each Balch tube containing 10 mL of medium. (A) Culture growth was monitored by measuring optical densities at 600 nm. Samples were taken for HPLC analysis at the beginning (B) and end (C) of the experiment. For this purpose, samples were filtered through 0.2  $\mu$ m acrodiscs and acidified with sulfuric acid. Metabolite analysis was performed using a LaChrom Elite system (Hitachi High Technologies America, Inc.) equipped with a refractive index detector (Model L-2490). Metabolites (cellobiose, glucose, lactic acid, acetic acid and ethanol) were separated at a flow rate of 0.5 ml/min in 5 mM H<sub>2</sub>SO<sub>4</sub> using an Aminex HPX- 87H column (Bio-Rad Laboratories, Inc.).

# Added Ethanol (v/v)

0%

1%

2%

3%

5%

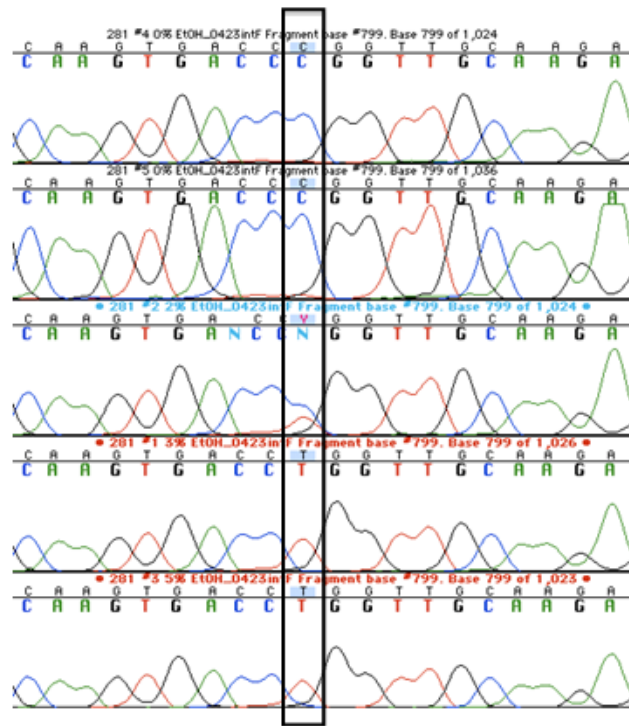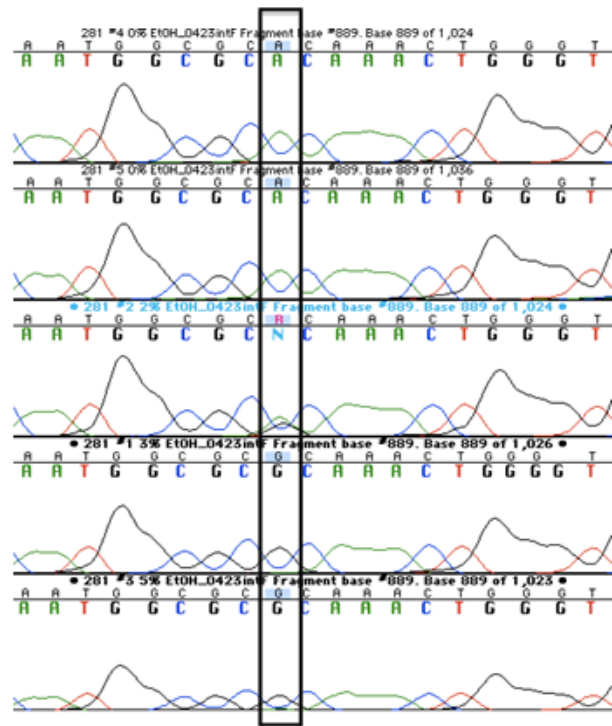

**Supplemental Figure S7. Chromosomal wild-type *adhE* gene replacement to *adhE\** version observed with increasing ethanol concentrations.** Sanger data for SNPs from PCR products amplified using flanking chromosomal primers.
